# Supplementary material for: Antioxidant properties of butylated phenol with oxadiazole and hydrazone moiety atorthoposition supported by DFT study
Source: Royal Society of Chemistry journal article supplement (doi:10.1039/d2ra02140d), 2022-01-01
Supplement: d2ra02140d1.pdf [file d2ra02140d1.pdf]

## Supplementary Information

### Antioxidant Properties of Butylated Phenol with Oxadiazole and Hydrazone moiety at *ortho* position supported by DFT Study

Raied M. Shakir, Muhammad Kumayl Abdulwahab, Nurdiana Nordin\*, and Azhar Ariffin\*

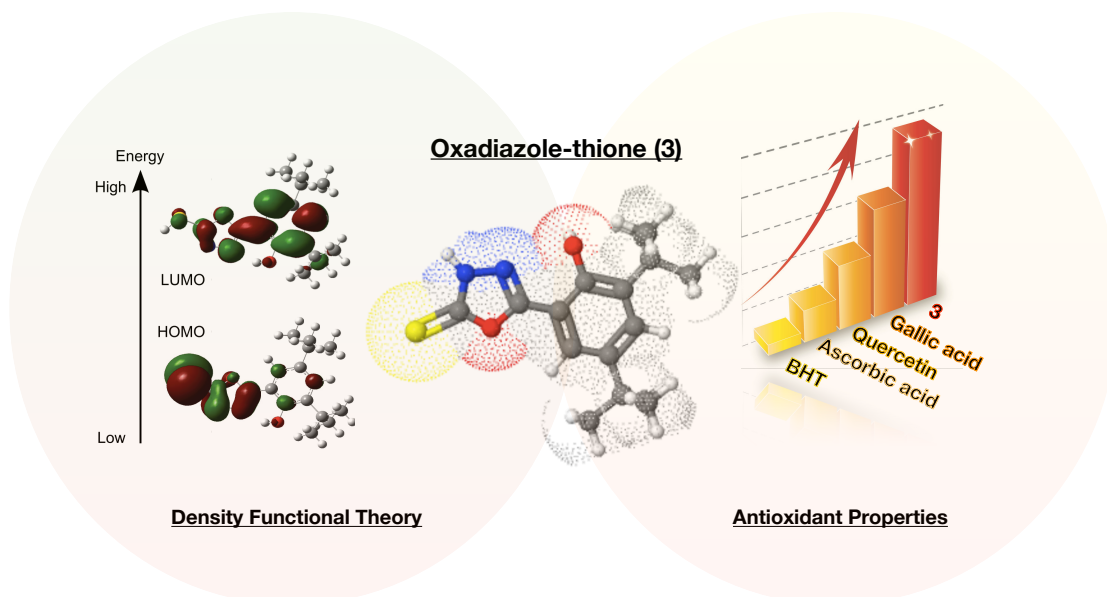

Two series of 1,3,4-oxadiazole derivatives at the sixth position of the 2,4-di-*tert*-butylphenol group were synthesized. The antioxidant properties were evaluated by DPPH and FRAP assays. Compound 3 showed significant antioxidant activity, while its alkyl derivatives exhibited decreased antioxidant activity in both assays. The preferential antioxidant mechanism of the reactive antioxidant molecules prepared from the further reaction of compound 3 to produce compounds 4 and 6 was investigated using density functional theory. Calculating their comprehensive reactivity descriptors was used to assess their antioxidant reactivity. According to the calculated descriptors, compounds 4c and 6d are the most reactive antioxidants within their own group compared to the other derivative moieties. The results are identical to ascorbic acid's, indicating that they have similar activity. The experimental data and the calculated descriptors are in good agreement. The nature of the substituents and their positions have a significant impact on the derivatives' antioxidant capabilities.

**Keywords**— di-*tert*-butyl phenol (DTBP), antioxidant, 1,3,4-oxadiazole, hydrazones, losing HNCO, DFT, BDE, IP

# 1 Contents

|   |                                                                   |    |
|---|-------------------------------------------------------------------|----|
| 2 | 1 Supporting Information 1: Chemistry                             | 2  |
| 3 | 1.1 Spectra                                                       | 2  |
| 4 | 1.2 The Mass and Loss of HNCO                                     | 19 |
| 5 | 2 Supporting Information 2: Theoretical and Computational details | 20 |
| 6 | 2.1 Optimisation of the Range-Separation Parameter                | 20 |
| 7 | 2.2 Radical Scavenging Pathways                                   | 20 |
| 8 | 2.3 Proposed resonance structures of FRAP mechanism               | 21 |
| 9 | 1 Supporting Information 1: Chemistry                             |    |

## 10 1.1 Spectra

11 As characterisation experiments, a one-dimensional (1D) NMR experiments were performed on the synthesised compounds in solutions  
12 at  $\approx 25^\circ\text{C}$  to identify the relevant signals. All chemical shifts are expressed in units of parts per million (ppm) with respect to TMS  
13 ( $0 \approx \text{ppm}$ ).

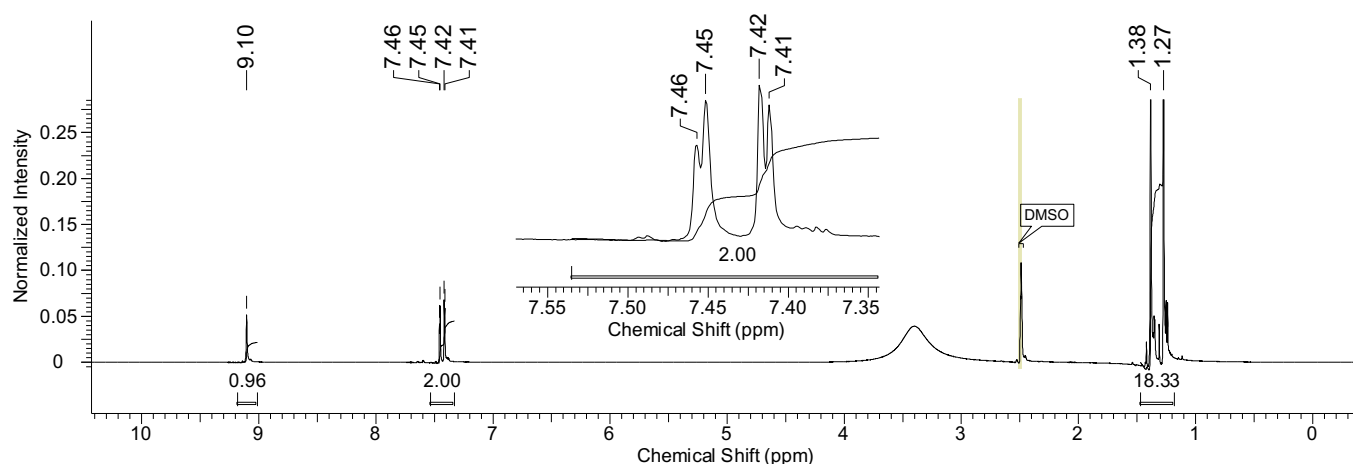

Figure 1  $^1\text{H}$  NMR of 3

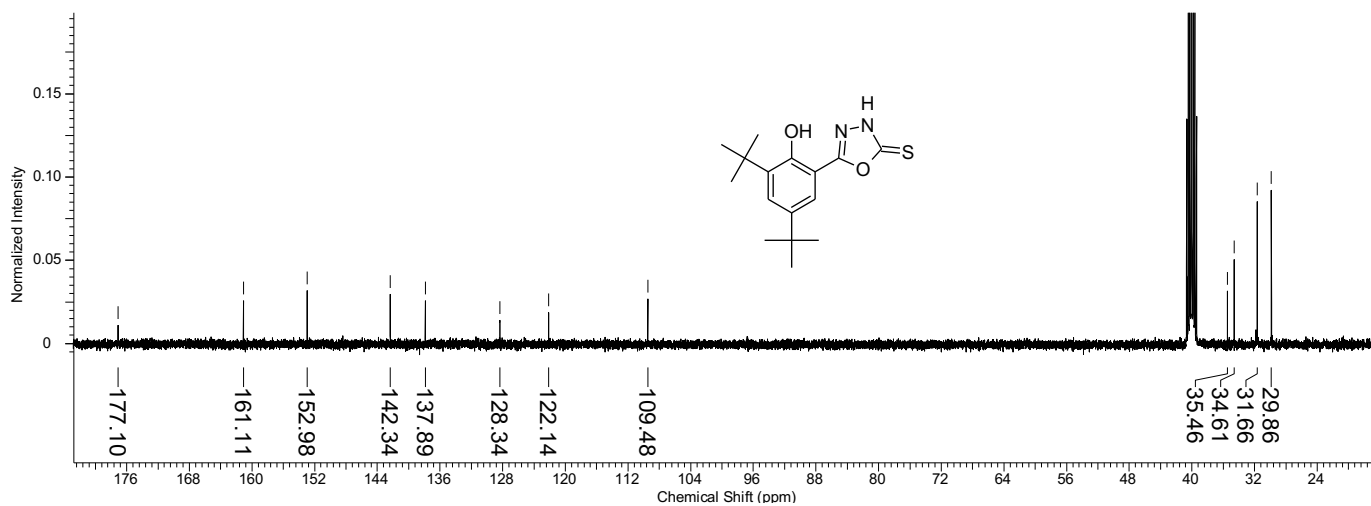

Figure 2  $^{13}\text{C}$  NMR of 3

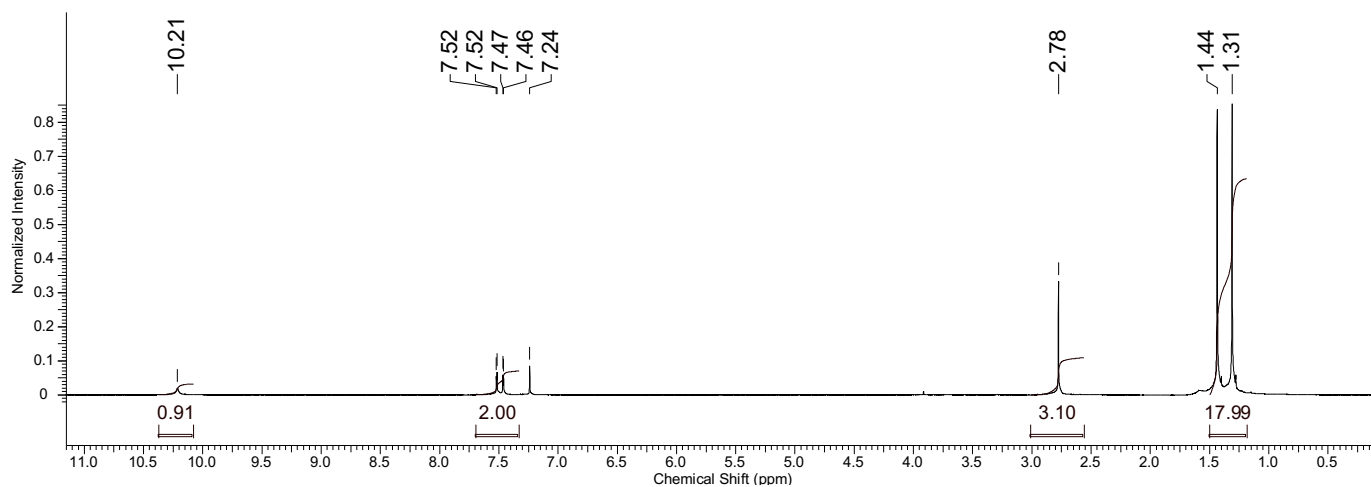

Figure 3  $^1\text{H}$  NMR of 4a

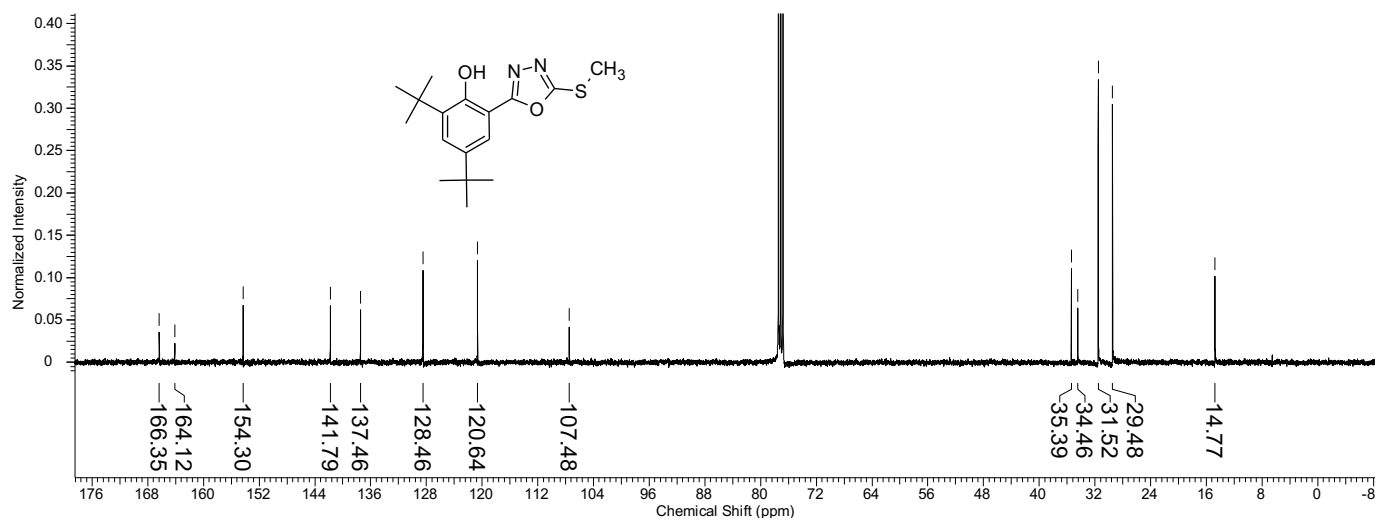

Figure 4  $^{13}\text{C}$  NMR of 4a

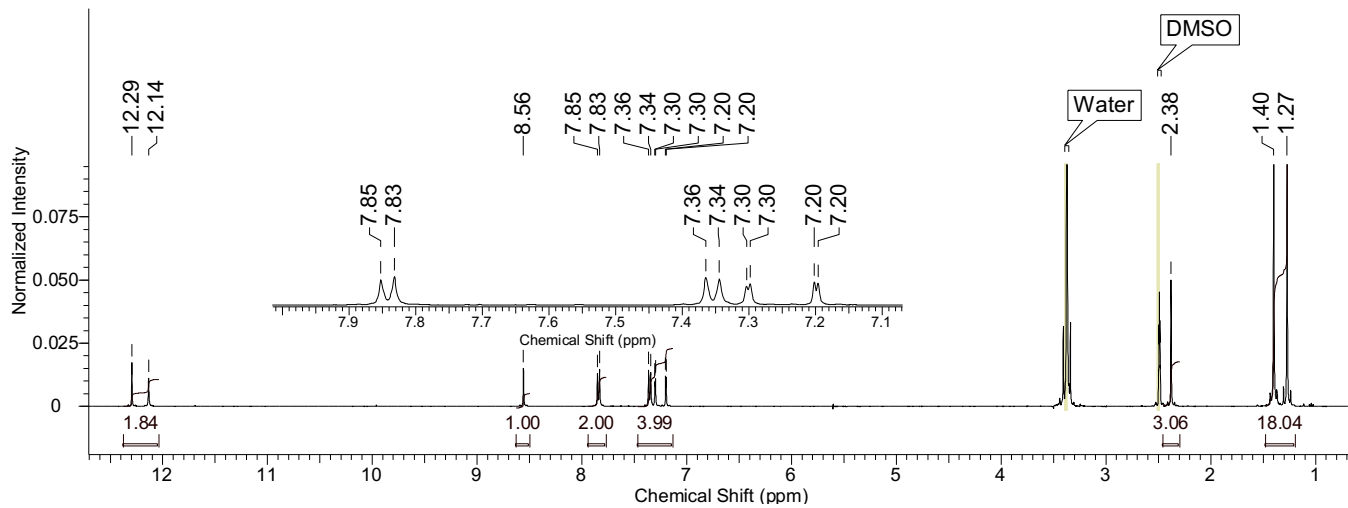

Figure 5  $^1\text{H}$  NMR of 4b

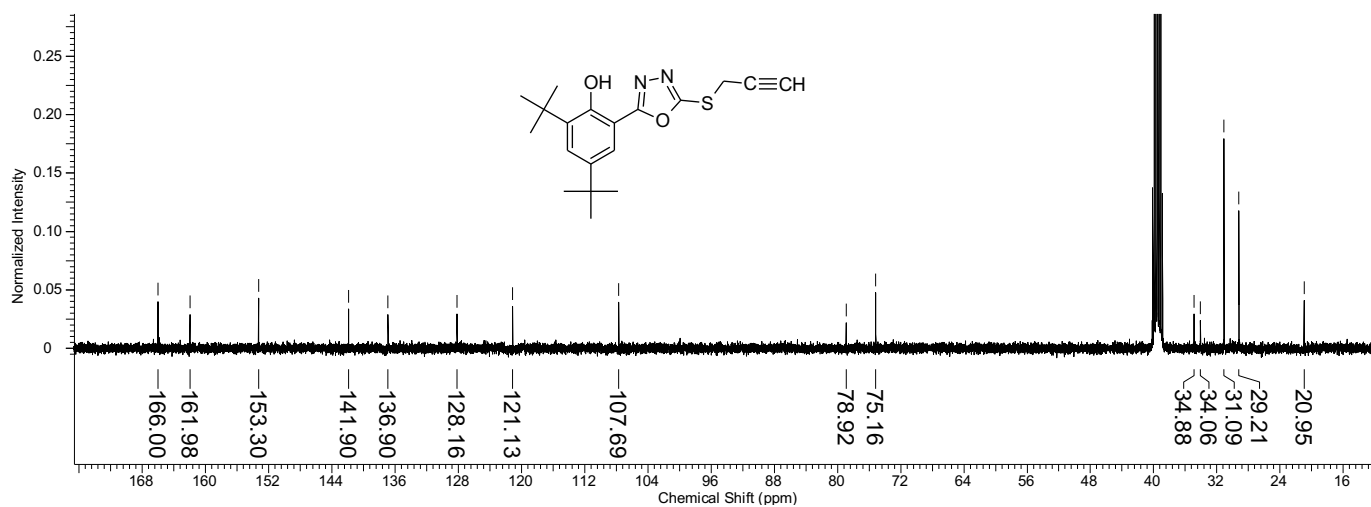

Figure 6  $^{13}\text{C}$  NMR of 4b

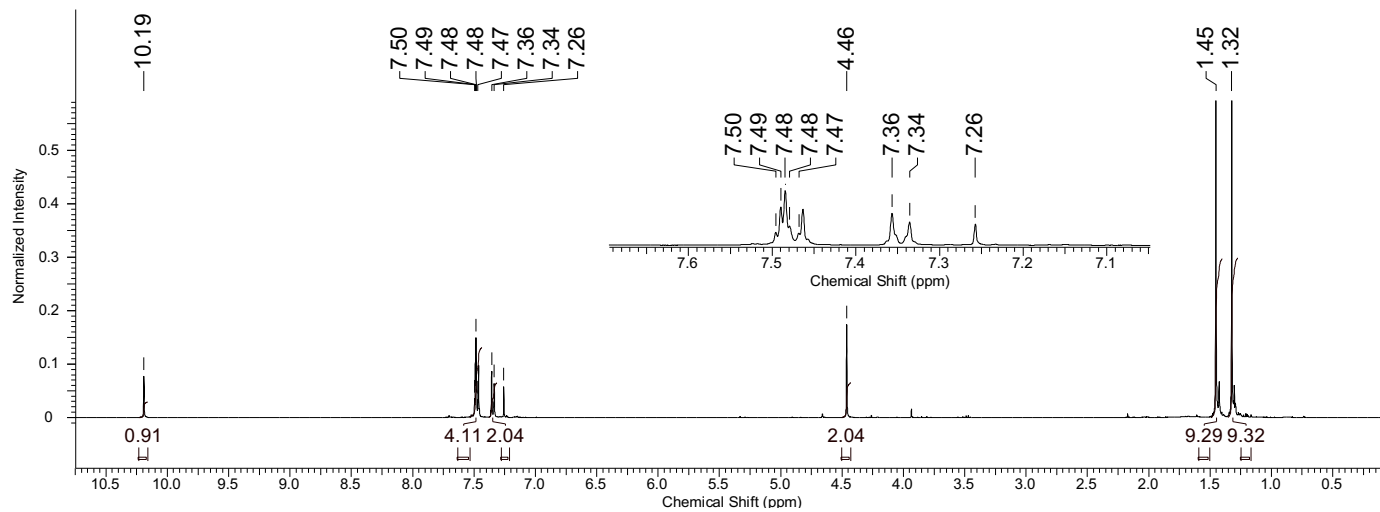

Figure 7  $^1\text{H}$  NMR of 4c

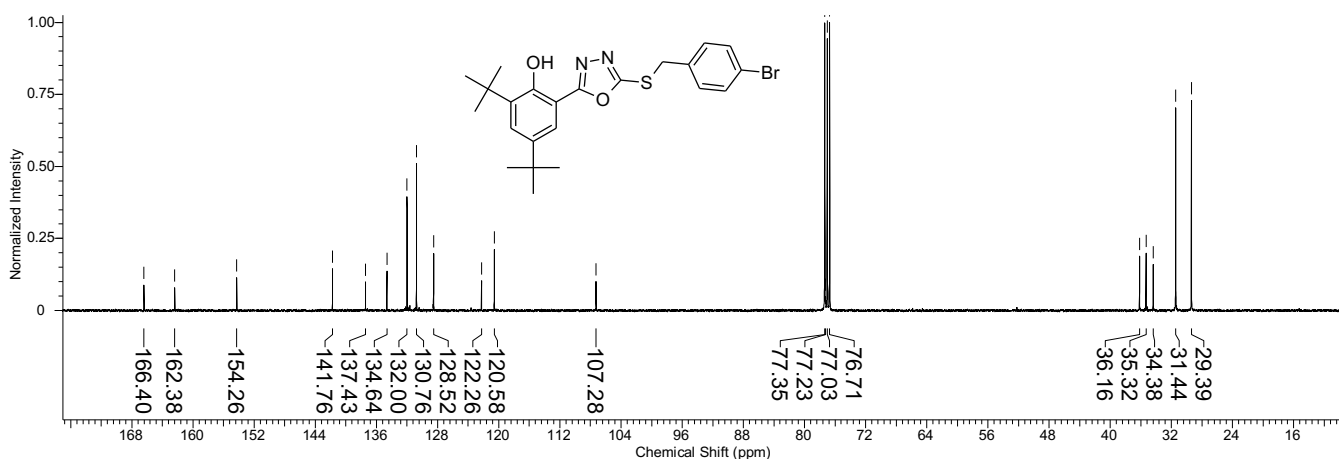

Figure 8  $^{13}\text{C}$  NMR of 4c

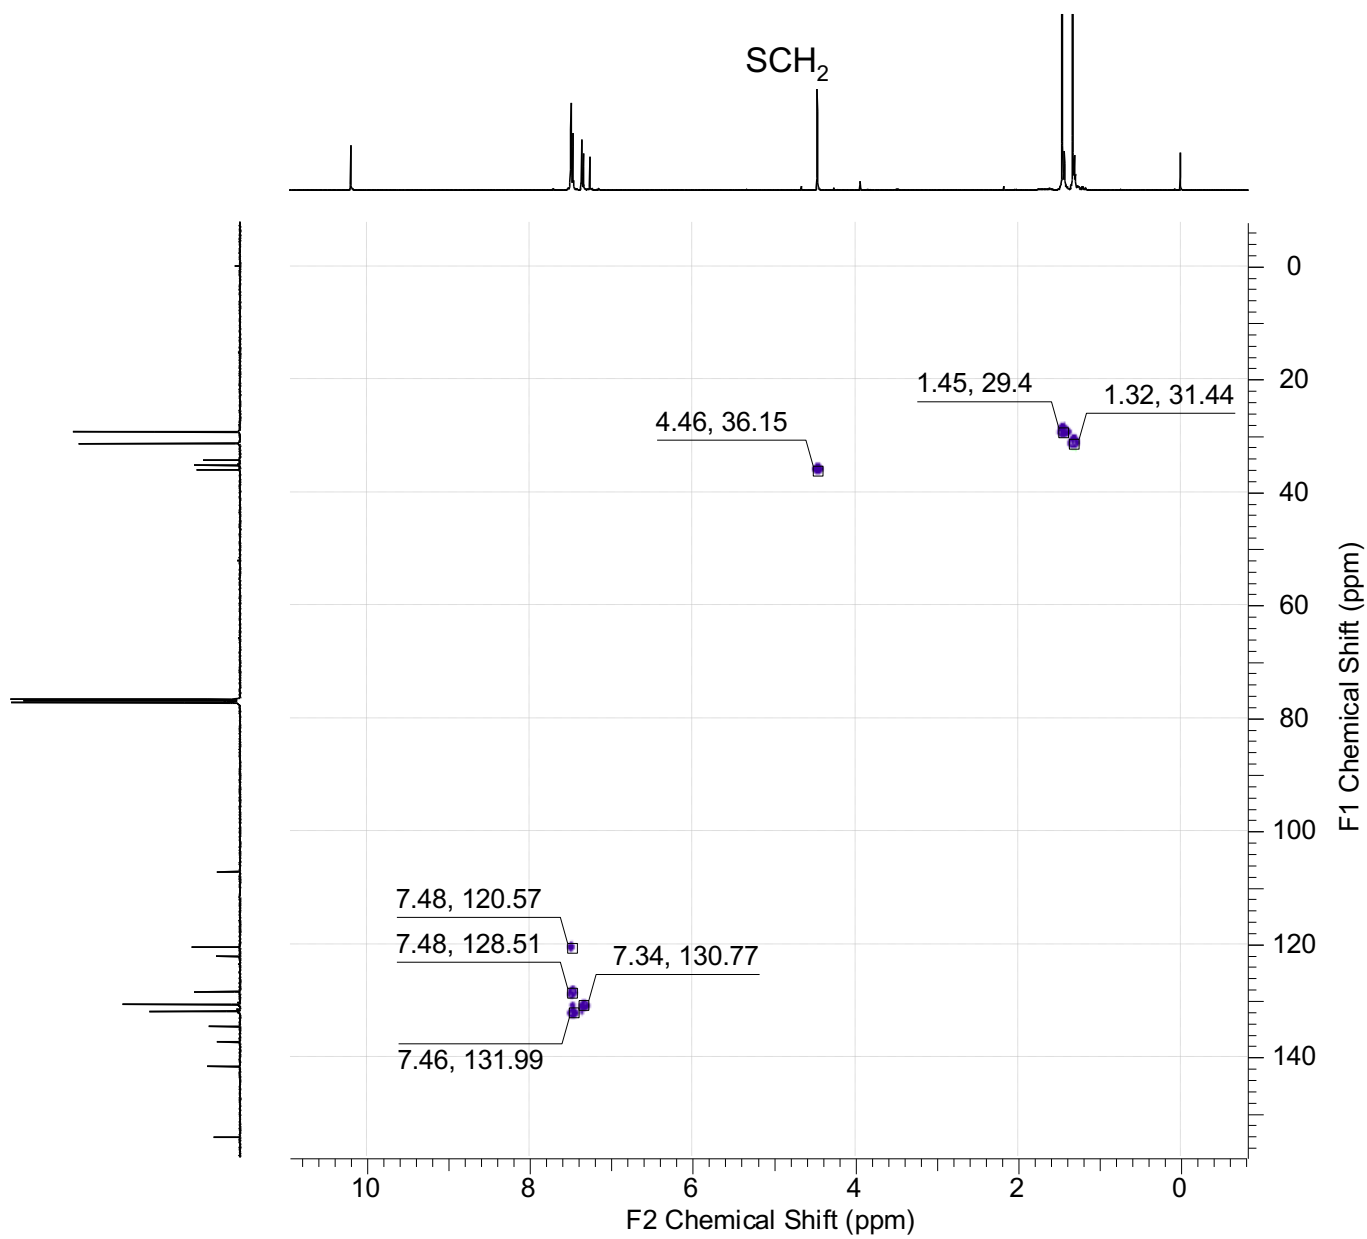

Figure 9 HSQC NMR of 4c

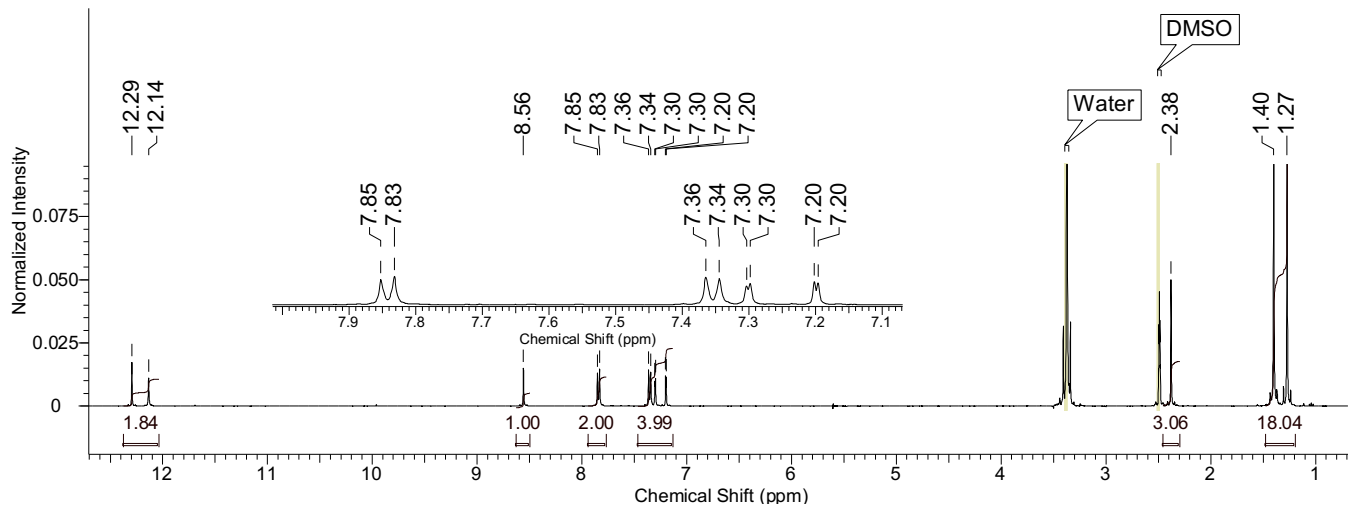

**Figure 10**  $^1\text{H}$  NMR of 5a

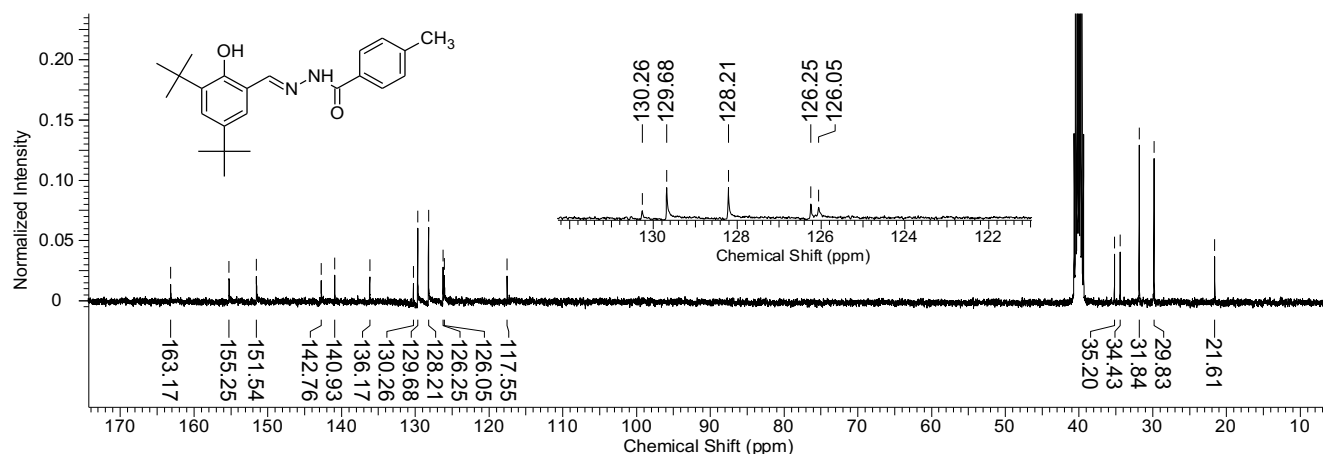

**Figure 11**  $^{13}\text{C}$  NMR of 5a

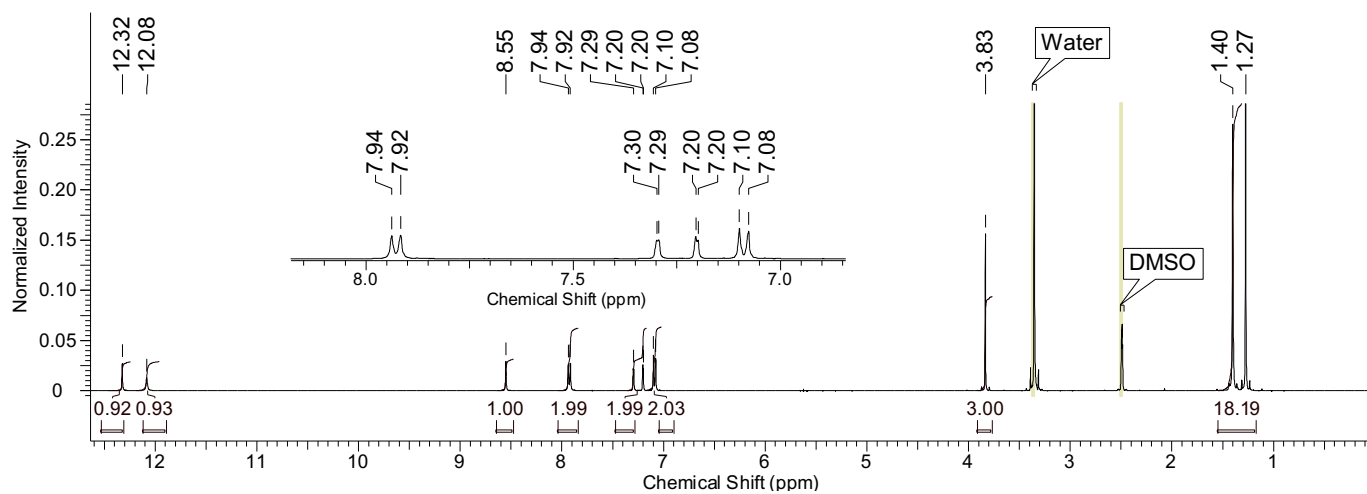

Figure 12  $^1\text{H}$  NMR of 5b

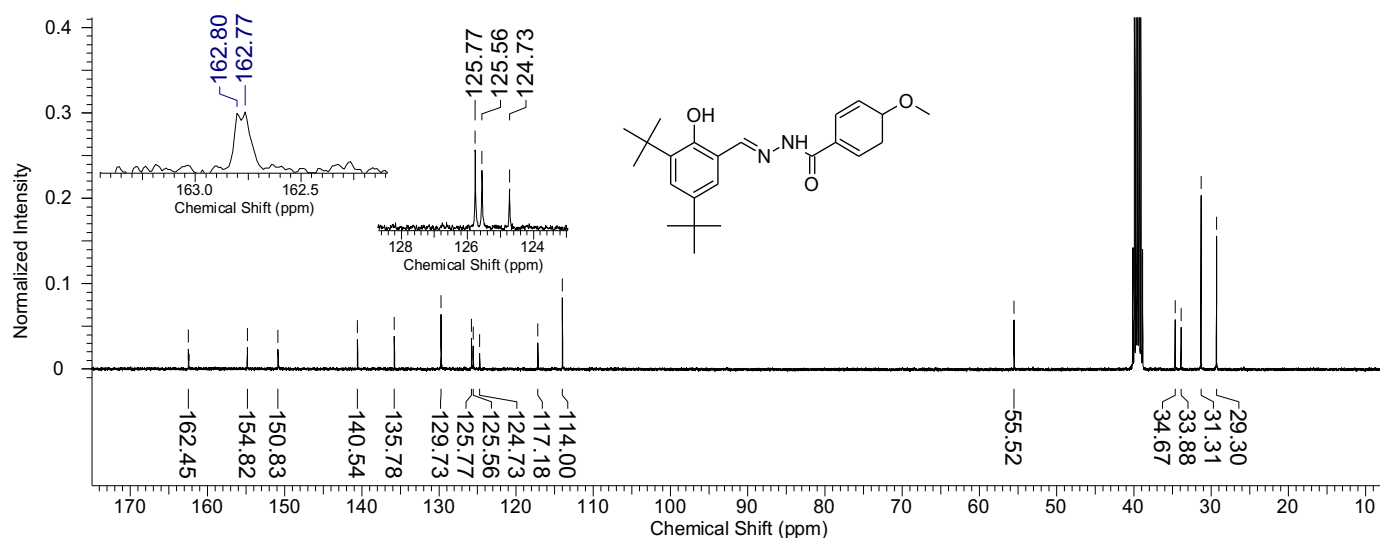

Figure 13  $^{13}\text{C}$  NMR of 5b



4OME-HYDRAZONE-HMBC-1.ESP

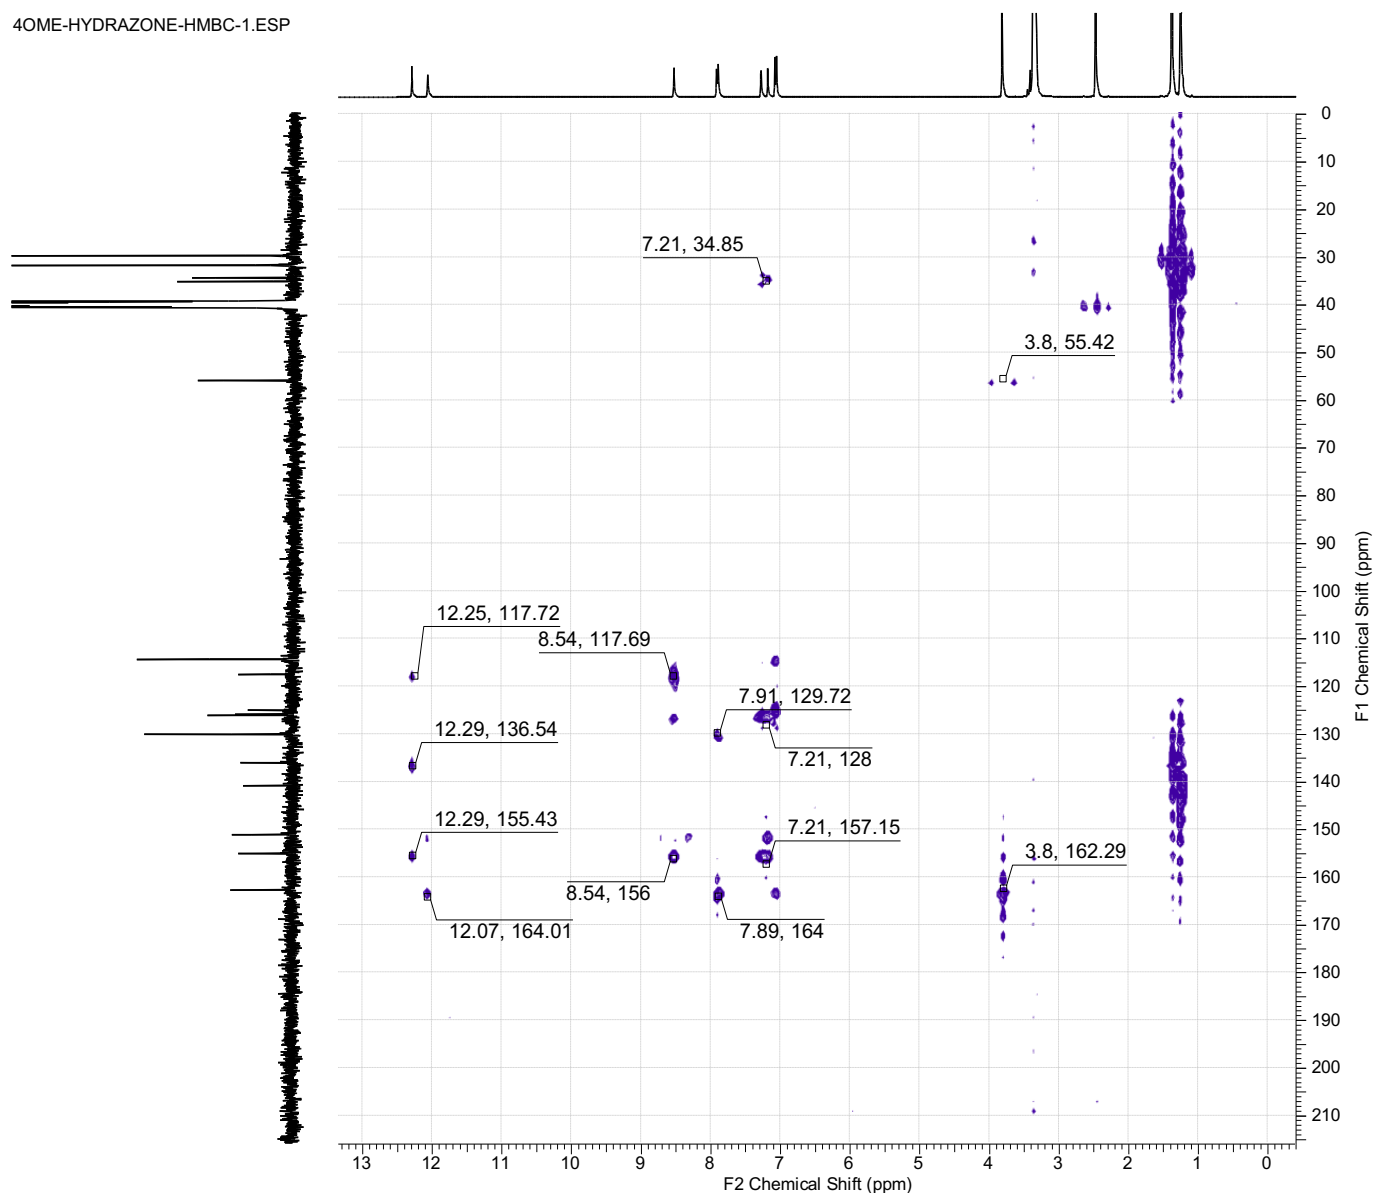

Figure 14 HMBC NMR of 5b

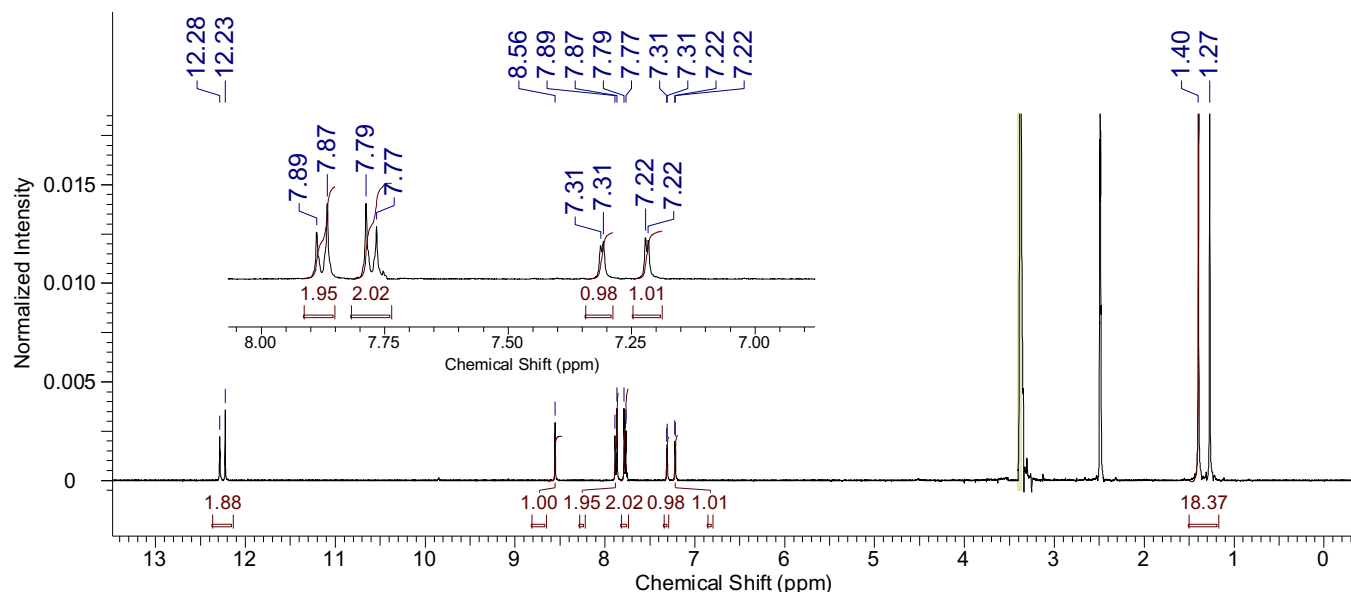

Figure 15  $^1\text{H}$  NMR of 5c

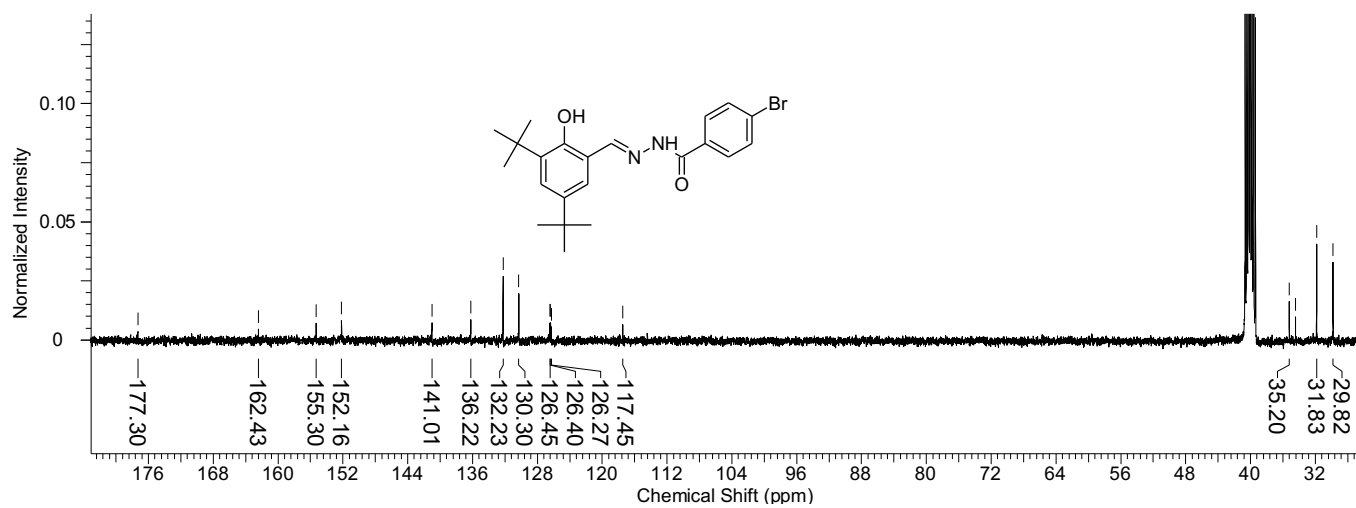

Figure 16  $^{13}\text{C}$  NMR of 5c

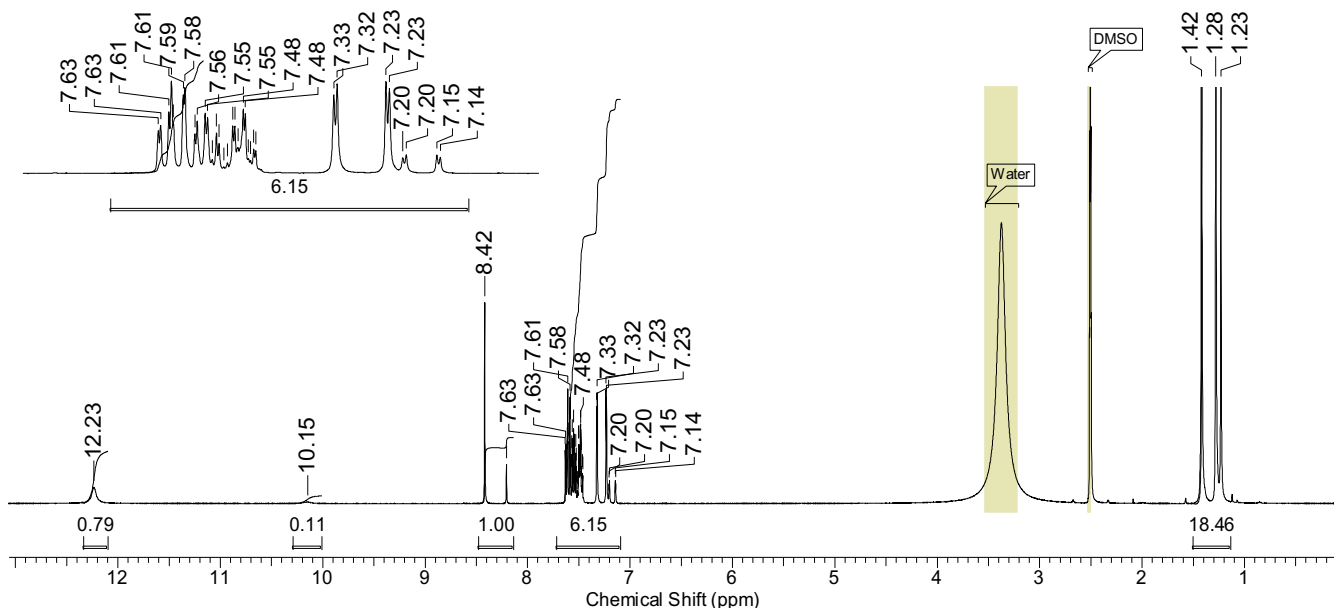

Figure 17  $^1\text{H}$  NMR of **5d**

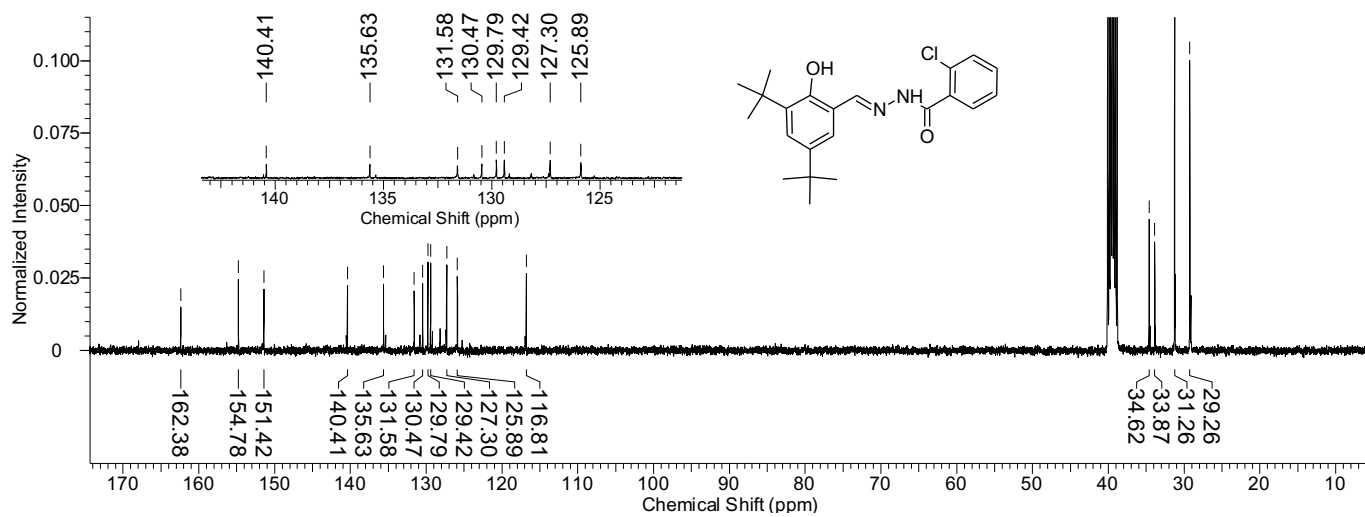

Figure 18  $^{13}\text{C}$  NMR of **5d**

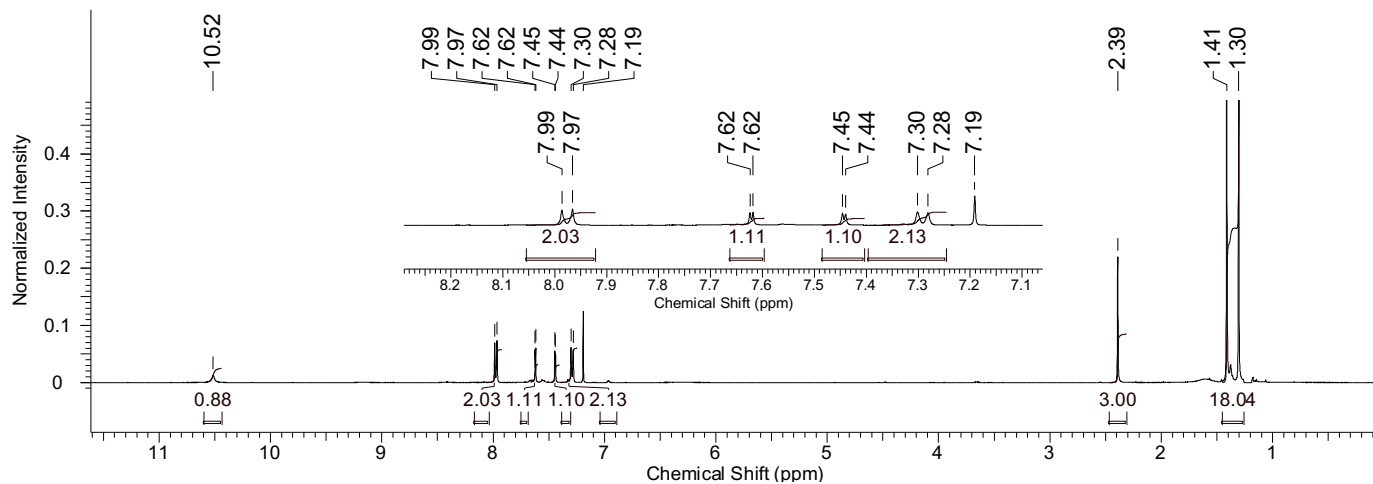

Figure 19  $^1\text{H}$  NMR of 6a

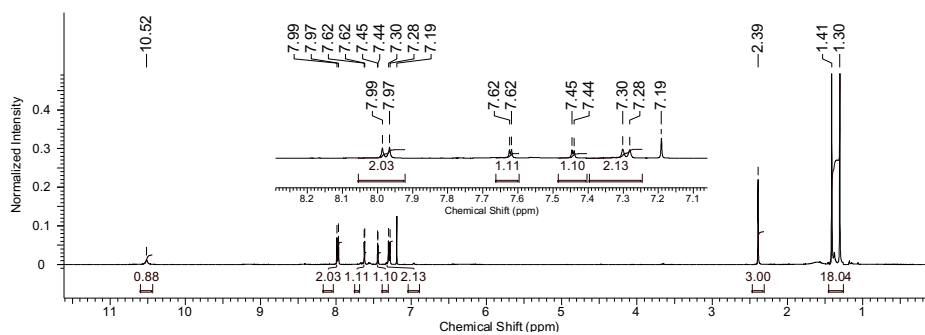

Figure 20  $^{13}\text{C}$  NMR of 6a

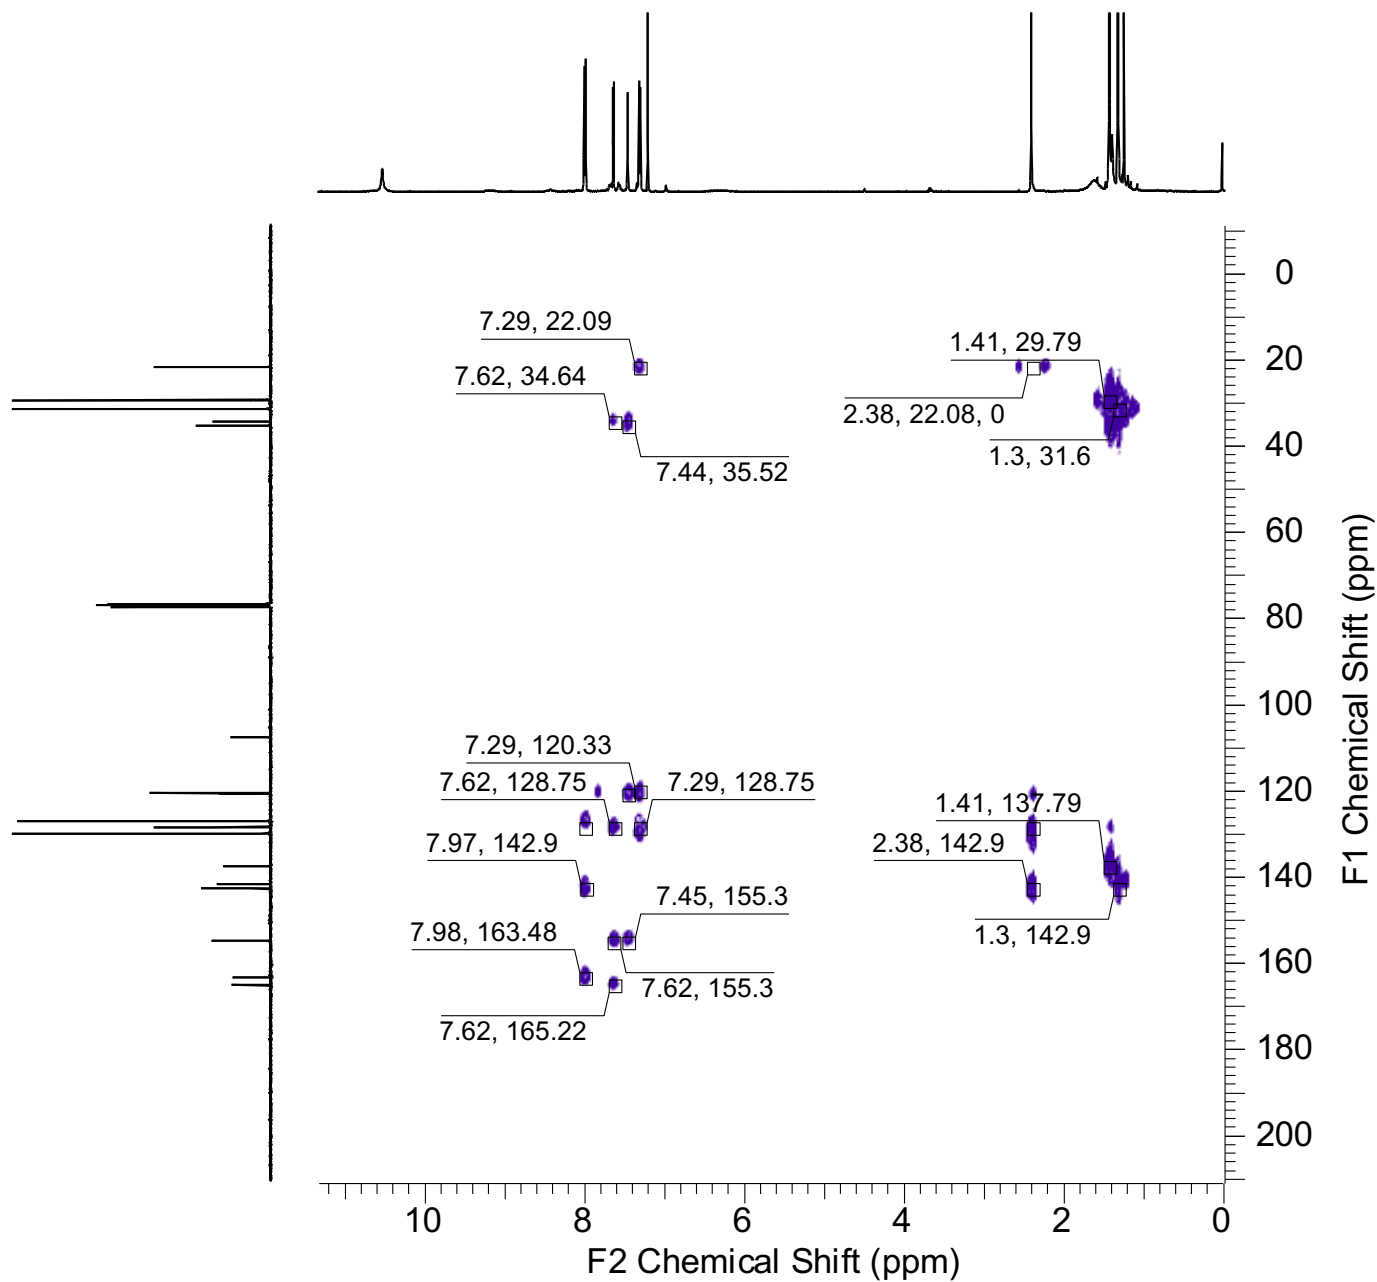

Figure 21 HMBC NMR of 6a

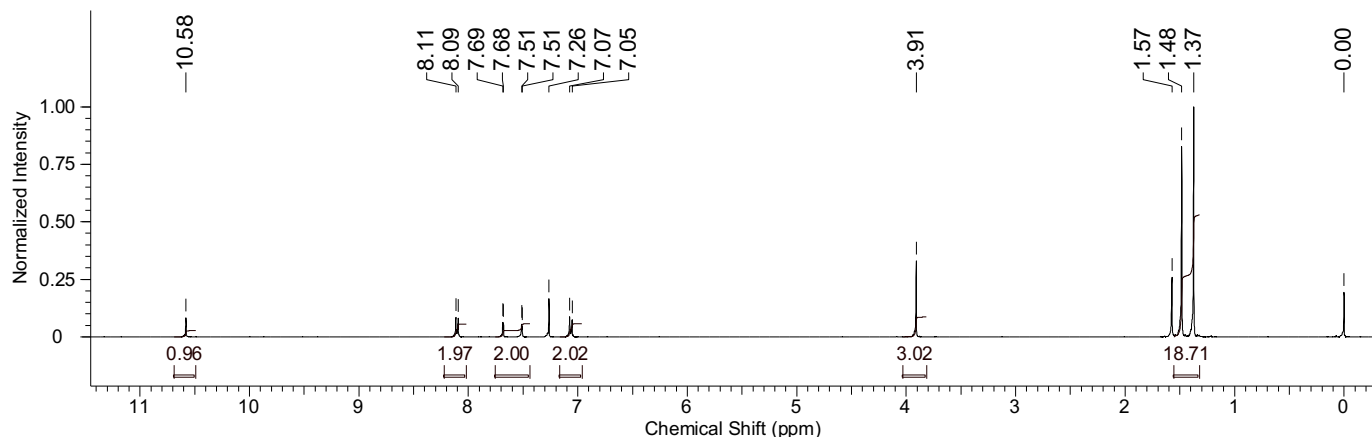

Figure 22  $^1\text{H}$  NMR of **6b**

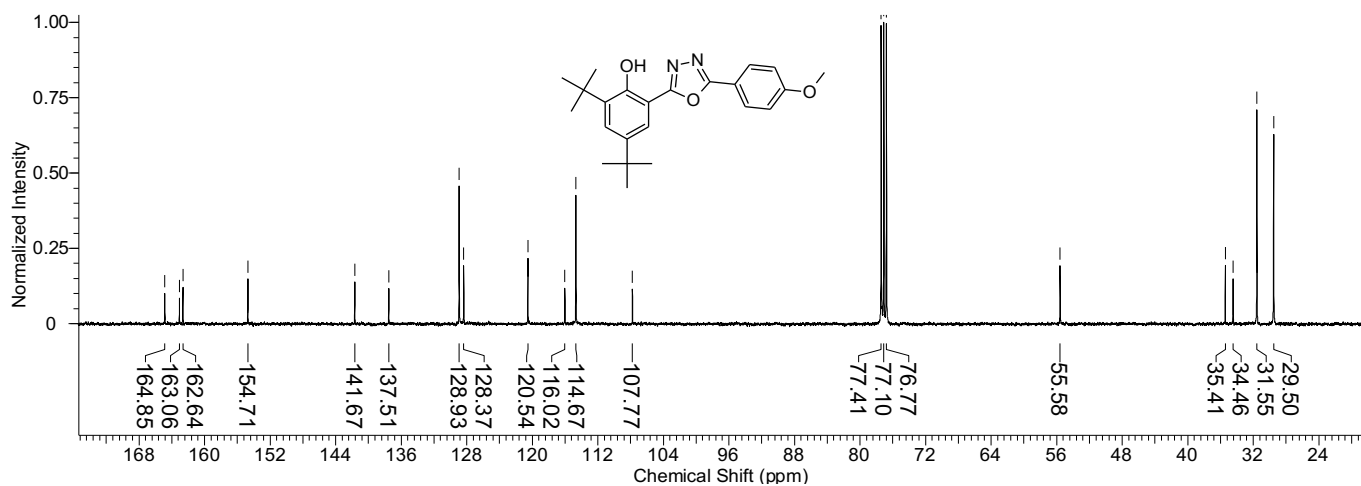

Figure 23  $^{13}\text{C}$  NMR of **6b**

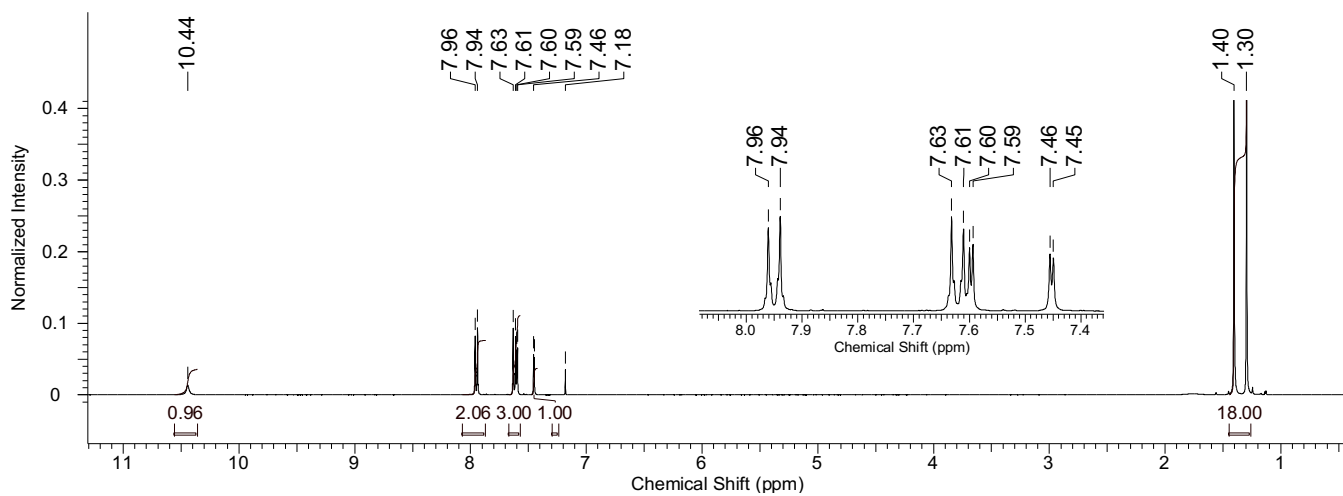

Figure 24  $^1\text{H}$  NMR of **6c**

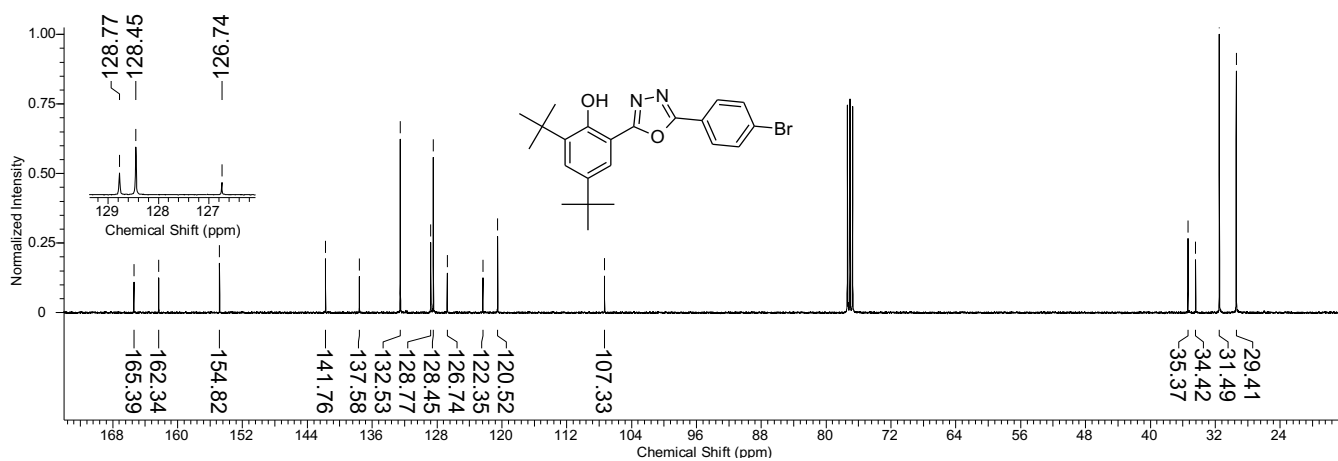

Figure 25  $^{13}\text{C}$  NMR of **6c**

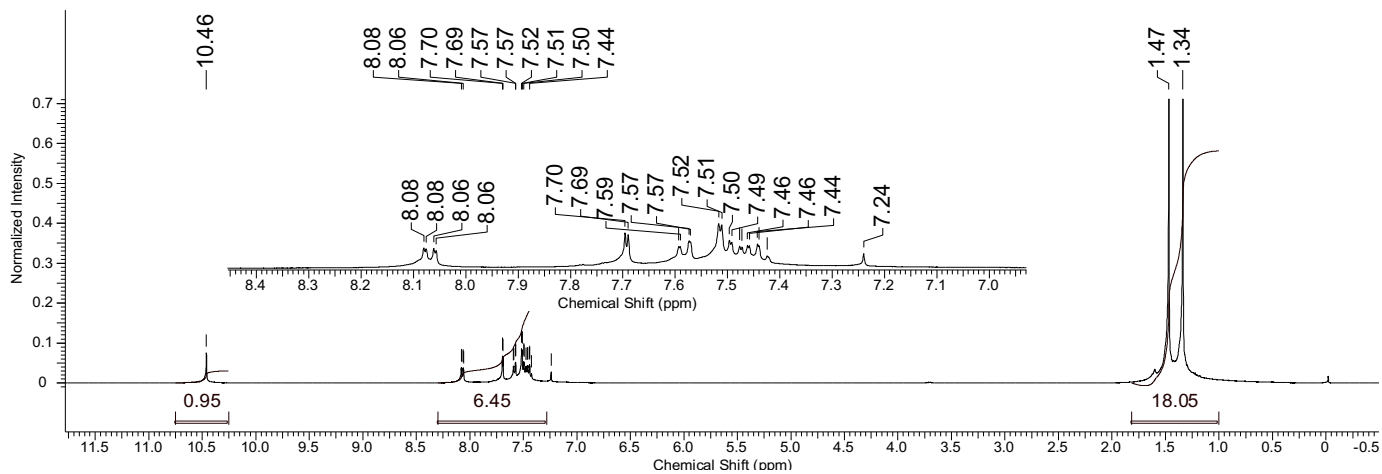

Figure 26  $^1\text{H}$  NMR of **6d**

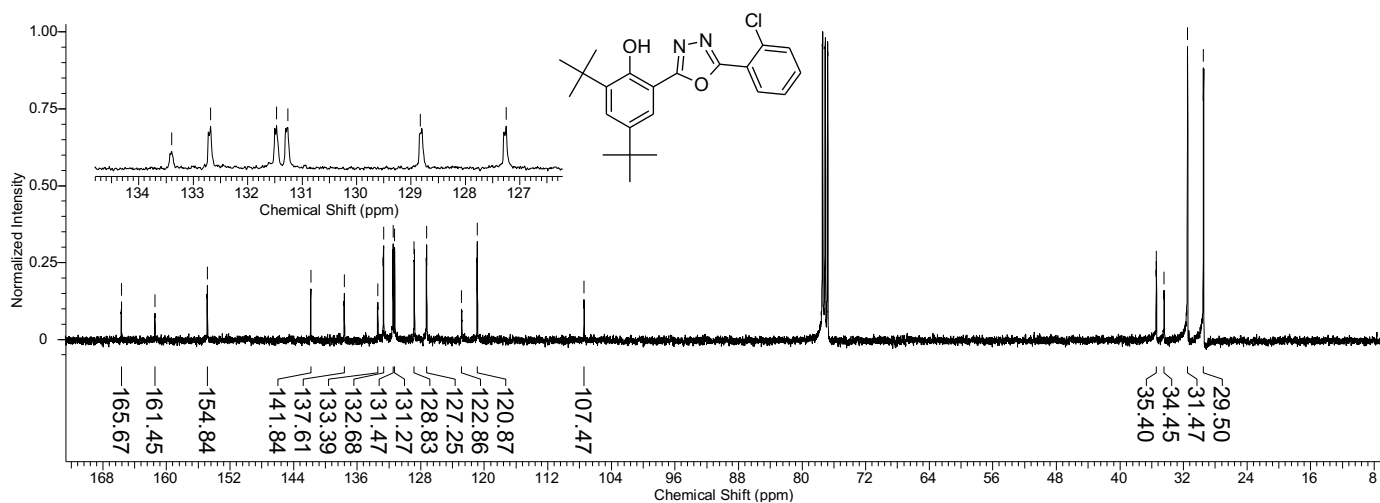

Figure 27  $^{13}\text{C}$  NMR of **6d**



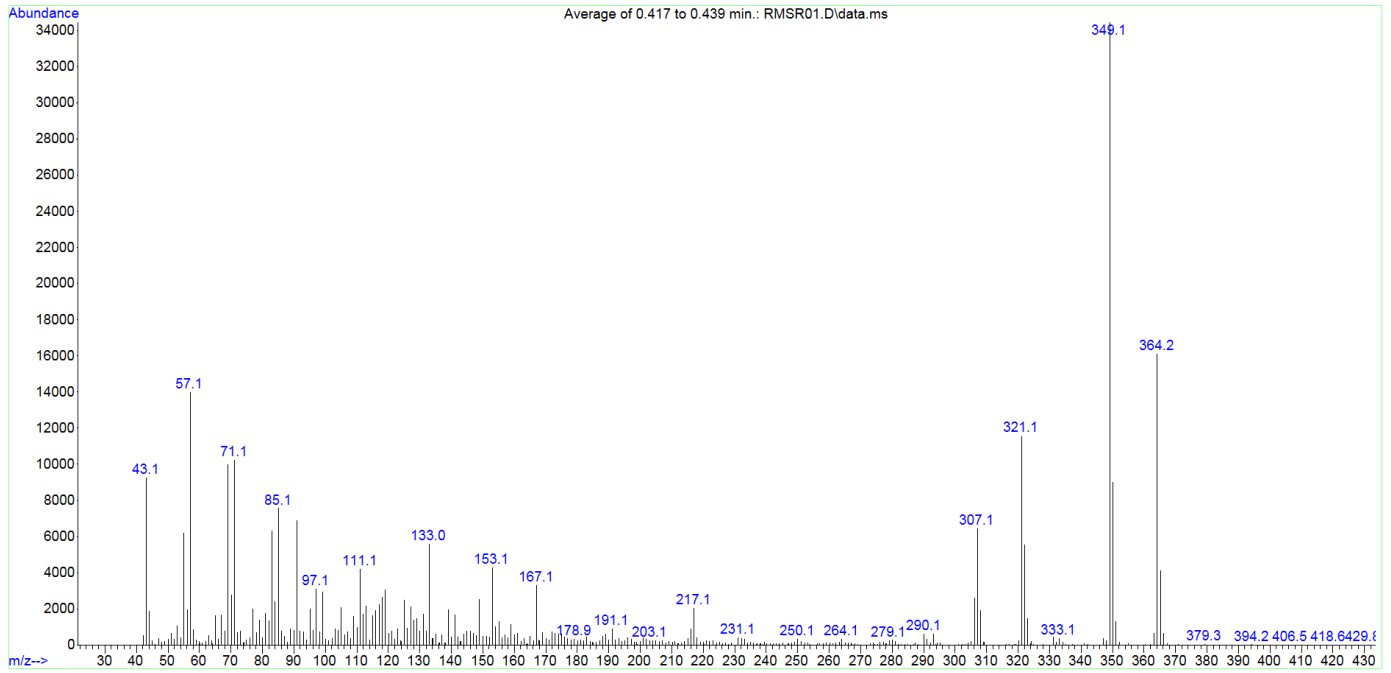

Figure 28 EIMs of 6a

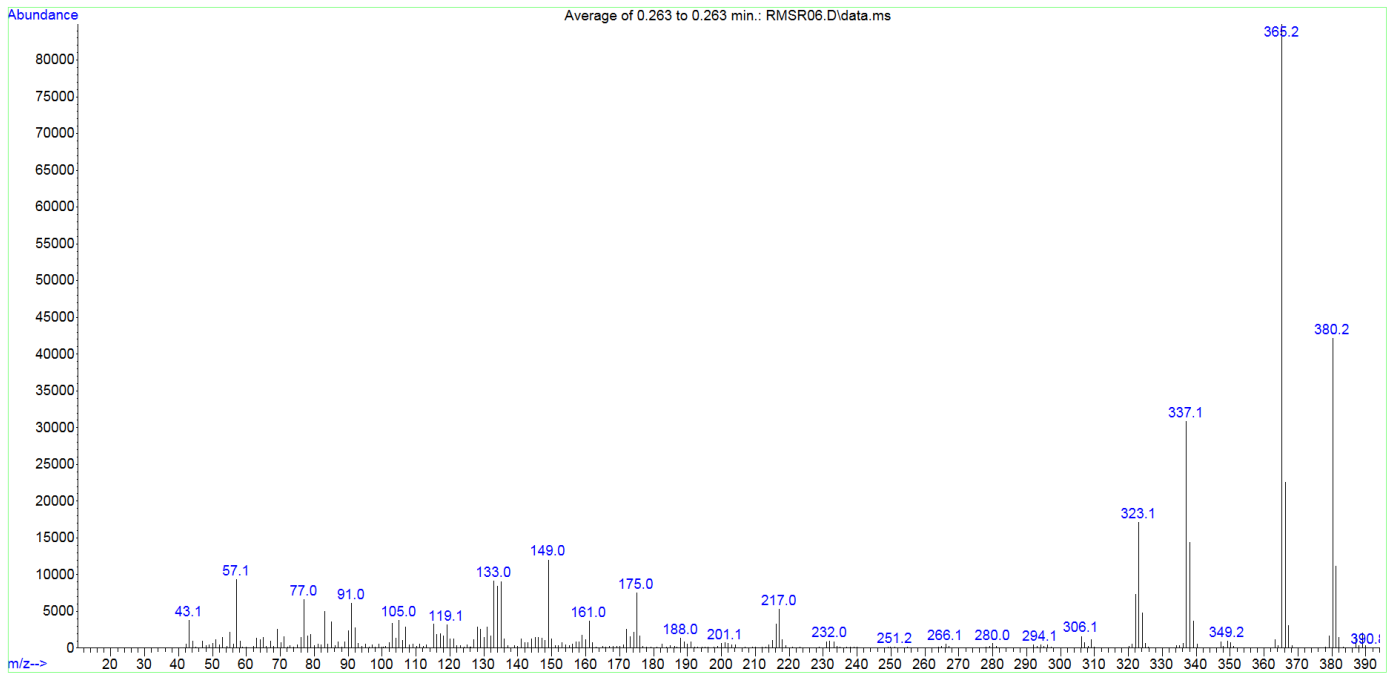

Figure 29 EIMs of 6b

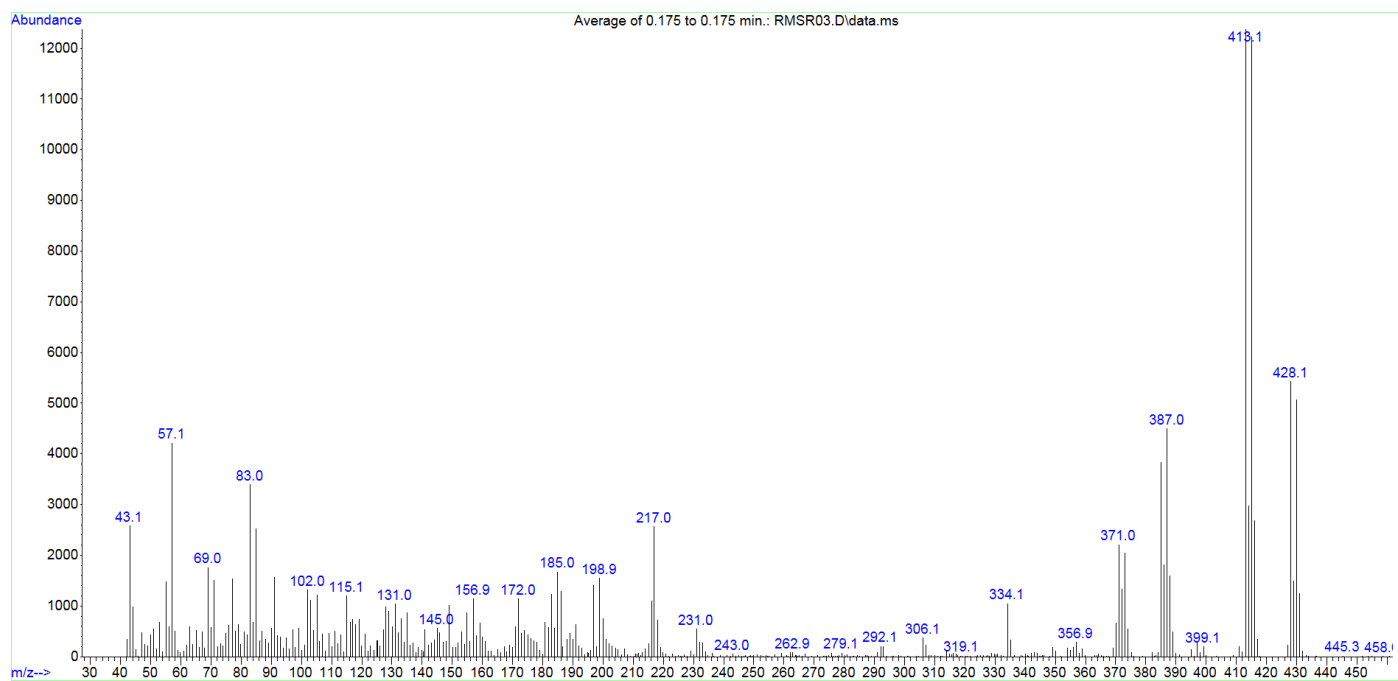

Figure 30 EIMs of 6c

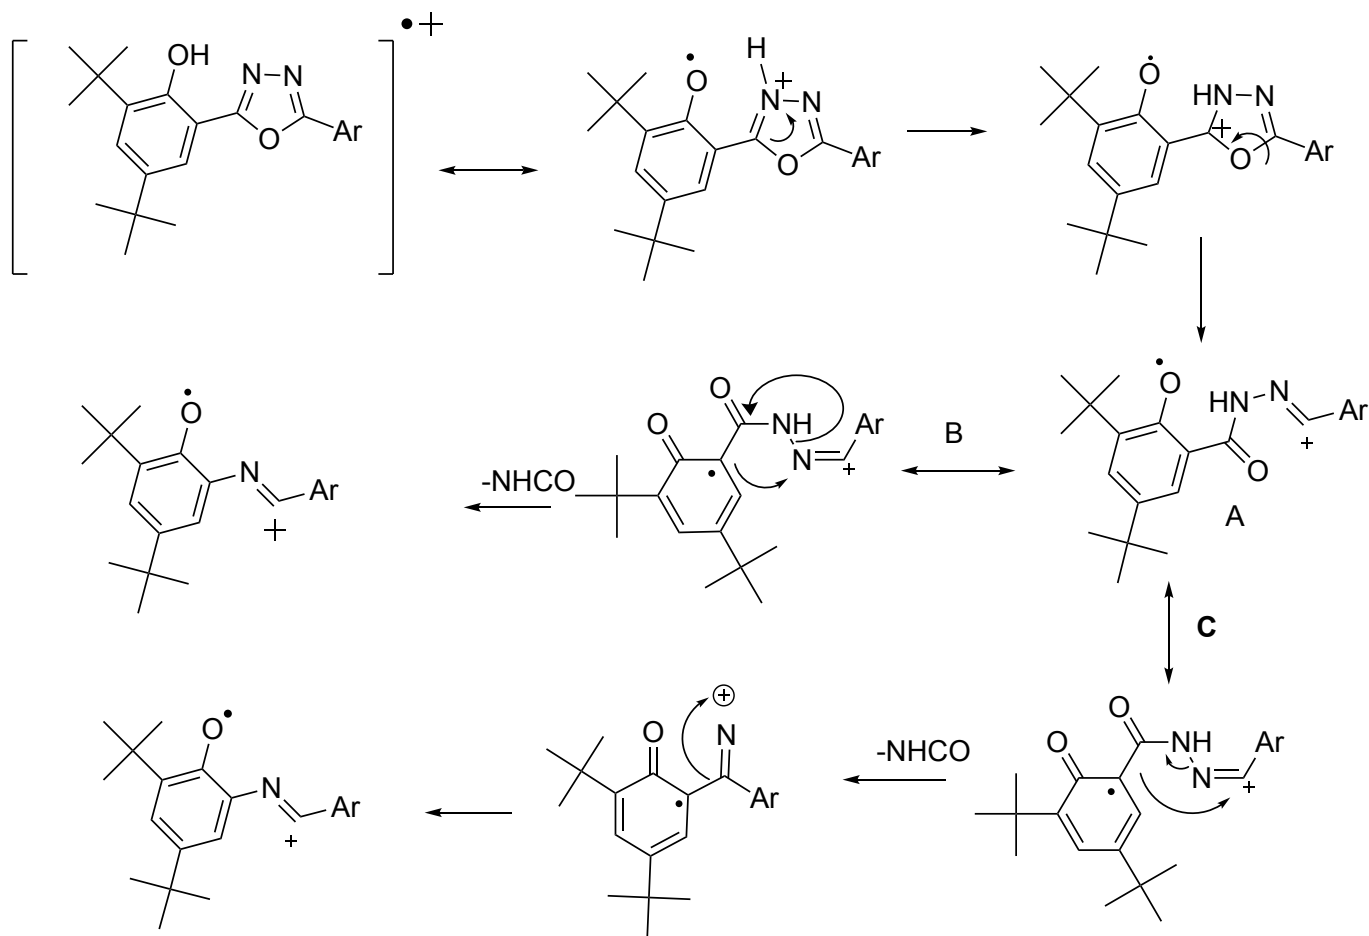

**Scheme 1** Proposed pathway of losing HNCO from the 1,3,4-oxadiazole

15 One interesting fragmentation pattern was the loss of isocyanic acid from 2,5 di-substituted 1,3,4-oxadiazole. The fragmentation  
 16 pattern has been mentioned in the literature and has been explained as being initiated through  $M\bullet+ + H$ .<sup>1</sup> However, in our study, we  
 17 observed that the pattern was initiated from  $M\bullet+$ , which can be attributed to proton transfer in  $M\bullet+$ . This transfer can occur through  
 18 the rearrangement of molecular ions and migration. The mechanism of losing HNCO is proposed in Scheme 1. The next fragment was  
 19 also detected (Scheme 2), and EIM spectra are tabulated in Table 1. (Please see Figures 28-30 for the respective EIM spectra.

| Compound  | $M^{\bullet+}$ | %  | Base peak 100%             | -HNCO | %  | Next step                  | %  |
|-----------|----------------|----|----------------------------|-------|----|----------------------------|----|
| <b>6a</b> | 364.2          | 52 | 349.1 (-CH <sub>3</sub> •) | 321.1 | 32 | 307.1 (-:CH <sub>2</sub> ) | 20 |
| <b>6b</b> | 380.2          | 52 | 366.1 (-CH <sub>3</sub> •) | 337.1 | 35 | 323.1 (-:CH <sub>2</sub> ) | 19 |
| <b>6c</b> | 428.1          | 50 | 413.1 (-CH <sub>3</sub> •) | 387.0 | 41 | 371.0 (-:CH <sub>2</sub> ) | 20 |
| <b>6d</b> | 384.1          | 40 | 369.1 (-CH <sub>3</sub> •) | 341.1 | 32 | 327.1 (-:CH <sub>2</sub> ) | 15 |

**Table 1** The EI mass for the oxadiazoles and the loss of HNCO value in the next step

20 **2 Supporting Information 2: Theoretical and Computational details**

21 **2.1 Optimisation of the Range-Separation Parameter.**

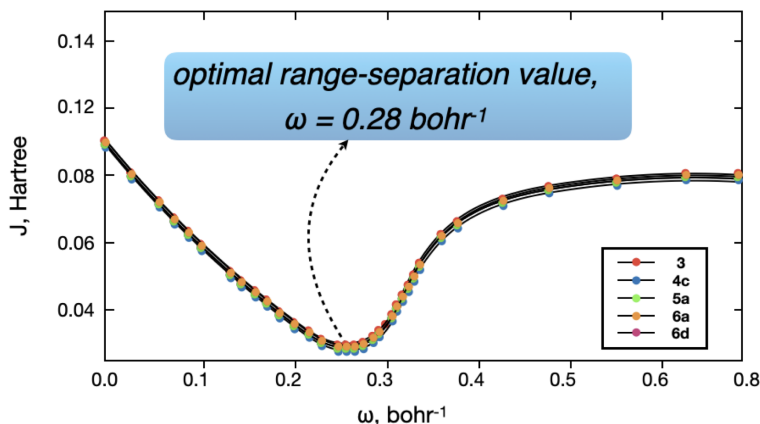

Figure 31 Functions defined in<sup>2</sup> used for optimisation of the range-separation parameter,  $\omega$  for the selected synthesised compounds.

22 Certain default values for the range separation parameter were established in<sup>3,4</sup> are used like universal constants in common  
 23 quantum chemical programs.<sup>5</sup> The value 0.28 bohr<sup>1</sup> was determined by a least-squares fit to empirical data for first- to third-row  
 24 atoms.<sup>3</sup>

25 **2.2 Radical Scavenging Pathways**

26 Three main mechanisms have been proposed to explain the radical scavenging ability of phenolic antioxidants. Therefore, free radicals  
 27 can be deactivated by antioxidants according to the following mechanisms.<sup>6-8</sup>

- 28 1. Hydrogen atom transfer (HAT, eq 1) from antioxidant molecules (ArOH) to radicals (R<sup>•</sup>)

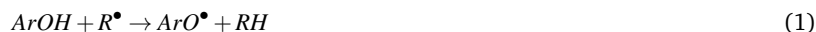

- 29 2. Two-step reaction: single-electron transfer followed by proton transfer (SET-PT, eq 2)

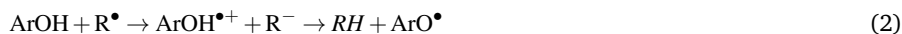

- 30 3. Two-step reaction: sequential proton loss electron transfer (SPLET, eq 3-5)

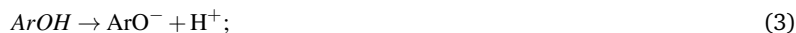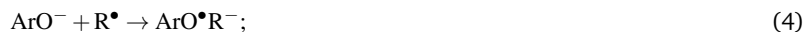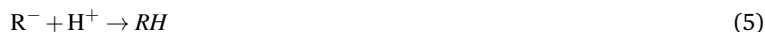

31 These mechanisms can occur at different periods, at various rates, and with varied priorities. The numerical parameters for BDE, IP,  
 32 and PDE mechanisms can be computed using theoretical techniques. In the equations below, these parameters are stated.

1. 
$$BDE = H_{ArO^{\bullet}}^{\bullet} + H_H^{\bullet} \sim H_{ArO} \quad (6)$$

2. 
$$IP = H_{ArOH^{\bullet+}}^{\bullet+} + H_e \sim H_{ArOH} \quad (7)$$

3. 
$$PDE = H_{ArO^{-}}^{\bullet-} + H_{H^{+}} \sim H_{ArOH^{\bullet+}} \quad (8)$$

33 where H denotes the molecular enthalpy of various species. The BDE parameter (eq 6) can be used to indicate the reactivity of ArOH  
 34 in the HAT route; the lower the BDE value, the higher the anticipated activity. IP and PDE from ArOH<sup>•+</sup> define the SET-PET mechanism.  
 35 Antioxidants with lower IP and PDE levels are considered to be more active.

### Compound 3

| 0 1 |             |             |             |
|-----|-------------|-------------|-------------|
| C   | 0.37990285  | -0.17221644 | 0.51186411  |
| C   | 1.75655486  | 0.05256077  | 0.37685862  |
| C   | 2.23109408  | 1.33781003  | 0.08212343  |
| C   | 1.32898159  | 2.39828294  | -0.07760206 |
| C   | -0.04767017 | 2.17350644  | 0.05740691  |
| C   | -0.52220964 | 0.88825648  | 0.35213863  |
| H   | 3.28219833  | 1.50943213  | -0.02095770 |
| H   | -0.73645316 | 2.98320074  | -0.06454848 |
| C   | 1.85045320  | 3.81064456  | -0.40148787 |
| C   | 2.74788753  | -1.11279341 | 0.55238430  |
| C   | 2.16515020  | -2.13763785 | 1.54319765  |
| H   | 2.85393324  | -2.94733204 | 1.66515370  |
| H   | 1.99917972  | -1.66507717 | 2.48873466  |
| H   | 1.23744874  | -2.51257158 | 1.16412688  |
| C   | 4.08308398  | -0.57316902 | 1.09796286  |
| H   | 4.77186709  | -1.38286311 | 1.21991885  |
| H   | 4.48797284  | 0.13889832  | 0.40954067  |
| H   | 3.91711343  | -0.10060845 | 2.04349986  |
| C   | 0.79802862  | 4.56850356  | -1.23194088 |
| H   | -0.11112266 | 4.64351973  | -0.67273023 |
| H   | 1.16034973  | 5.54981984  | -1.45697816 |
| H   | 0.61362872  | 4.03873550  | -2.14311729 |
| C   | 2.11585143  | 4.57311473  | 0.90992471  |
| H   | 2.84708151  | 4.04655040  | 1.48692777  |
| H   | 2.47817261  | 5.55443095  | 0.68488716  |
| H   | 1.20670023  | 4.64813112  | 1.46913548  |
| C   | 3.15895117  | 3.70267705  | -1.20633323 |
| H   | 3.89018125  | 3.17611272  | -0.62933014 |
| H   | 2.97455108  | 3.17290878  | -2.11750952 |
| H   | 3.52127234  | 4.68399324  | -1.43137078 |
| C   | 2.98676109  | -1.79292753 | -0.80848196 |
| H   | 3.67554418  | -2.60262162 | -0.68652583 |
| H   | 2.05905969  | -2.16786141 | -1.18755276 |
| H   | 3.39164999  | -1.08086028 | -1.49690422 |
| C   | -2.03501383 | 0.64124925  | 0.50049958  |
| C   | -4.13927868 | 0.96261100  | 0.93191536  |
| N   | -3.90852966 | -0.30386245 | 1.05139378  |
| N   | -2.55456641 | -0.51064231 | 0.77378354  |
| O   | -3.02919757 | 1.66187231  | 0.35828408  |
| S   | -5.65738246 | 1.74703341  | 1.43035543  |
| H   | -6.64817738 | 0.89902423  | 1.30663871  |
| O   | -0.10432122 | -1.48369624 | 0.81260946  |
| H   | -0.92000976 | -1.41639371 | 1.31432908  |

Figure 32 Cartesian coordinates for compound 3.

### 36 2.3 Proposed resonance structures of FRAP mechanism

37 The acidic medium (pH 3.6) is required to facilitate Fe<sup>3+</sup> complex solubility, yet the condition also results in lower ionisation potential,  
 38 which promotes the single electron transfer mechanism, as opposed to the hydrogen atom transfer mechanism in DPPH assay (Figure  
 39 38).<sup>9</sup> The activation of the thiol group is caused by electron transfer followed by proton removal from the hydroxyl group.<sup>9</sup> This  
 40 reaction allows one mole of compound 3 to reduce two moles of Fe<sup>3+</sup>, resulting in a compound 3 with a high FRAP value and potent  
 41 antioxidant capability.

### 42 Notes and references

- 43 [1] B. Frański Rafałand Gierczyk and G. Schroeder, *International Journal of Mass Spectrometry*, 2004, **231**, 47–49.
- 44 [2] O. S. Bokareva, G. Grell, S. I. Bokarev and O. Kuhn, *Journal of Chemical Theory and Computation*, 2015, **11**, 1700–1709.
- 45 [3] Y. Tawada, T. Tsuneda, S. Yanagisawa, T. Yanai and K. Hirao, *The Journal of Chemical Physics*, 2004, **120**, 8425–8433.
- 46 [4] J.-W. Song, T. Hirose, T. Tsuneda and K. Hirao, *The Journal of Chemical Physics*, 2007, **126**, 154105.
- 47 [5] K. Ishimura, L. McMurchie, E. Davidson and J. Rys, *Journal of Computational Chemistry*, 1993, **14**, 1347–1363.
- 48 [6] M. Leopoldini, N. Russo and M. Toscano, *Food Chemistry*, 2011, **125**, 288–306.
- 49 [7] J. S. Wright, E. R. Johnson and G. A. DiLabio, *Journal of the American Chemical Society*, 2001, **123**, 1173–1183.

## Compound 4c

|     |              |             |             |
|-----|--------------|-------------|-------------|
| 0 1 |              |             |             |
| C   | 0.37176817   | -0.15992076 | 0.50846070  |
| C   | 1.75177602   | 0.05917033  | 0.40112330  |
| C   | 2.23648042   | 1.33775417  | 0.09425794  |
| C   | 1.34120507   | 2.39724780  | -0.10534935 |
| C   | -0.03879497  | 2.17815393  | 0.00185712  |
| C   | -0.52351939  | 0.89957264  | 0.30876715  |
| H   | 3.29014172   | 1.50503344  | 0.01236047  |
| H   | -0.72236501  | 2.98709455  | -0.15061624 |
| C   | 1.87389743   | 3.80229103  | -0.44249656 |
| C   | 2.73567537   | -1.10507168 | 0.62036938  |
| C   | 2.12763659   | -2.11050428 | 1.61584935  |
| H   | 2.81127082   | -2.91942042 | 1.76817310  |
| H   | 1.94130396   | -1.62054417 | 2.54864996  |
| H   | 1.20786868   | -2.49012930 | 1.22239148  |
| C   | 4.05945468   | -0.55868598 | 1.18664435  |
| H   | 4.74309918   | -1.36759089 | 1.33896394  |
| H   | 4.48191280   | 0.13989967  | 0.49497293  |
| H   | 3.87311836   | -0.06872737 | 2.11944549  |
| C   | 0.84299693   | 4.54749445  | -1.31055419 |
| H   | -0.07859496  | 4.63474509  | -0.77393648 |
| H   | 1.21312878   | 5.52372841  | -1.54479662 |
| H   | 0.67818301   | 4.00178585  | -2.21605786 |
| C   | 2.11110414   | 4.58771118  | 0.86075185  |
| H   | 2.82737866   | 4.06994260  | 1.46388440  |
| H   | 2.48123169   | 5.56394392  | 0.62650146  |
| H   | 1.18951607   | 4.67496155  | 1.39737610  |
| C   | 3.20029343   | 3.67670396  | -1.21482658 |
| H   | 3.91656301   | 3.15892902  | -0.61169371 |
| H   | 3.03547641   | 3.13098960  | -2.12032605 |
| H   | 3.57043038   | 4.65293349  | -1.44907587 |
| C   | 3.00385012   | -1.81024856 | -0.72217056 |
| H   | 3.68748977   | -2.61916146 | -0.56985867 |
| H   | 2.08407788   | -2.18987771 | -1.11561575 |
| H   | 3.42630997   | -1.11166515 | -1.41384065 |
| C   | -2.04002344  | 0.65887649  | 0.42656086  |
| C   | -4.15284863  | 0.99312130  | 0.80288594  |
| N   | -3.92845916  | -0.27147088 | 0.95103907  |
| N   | -2.56899076  | -0.48654521 | 0.70884654  |
| O   | -3.02776941  | 1.67906525  | 0.24258832  |
| S   | -5.67997620  | 1.79022462  | 1.25109807  |
| O   | -0.12283001  | -1.46457976 | 0.82172261  |
| H   | -0.94963590  | -1.38626912 | 1.30324694  |
| C   | -7.02516486  | 0.63823992  | 1.07282707  |
| H   | -6.86116666  | -0.20340531 | 1.71285728  |
| H   | -7.07975715  | 0.30815787  | 0.05647510  |
| C   | -8.34644622  | 1.32798683  | 1.46019199  |
| C   | -8.79580281  | 1.28659014  | 2.78694845  |
| C   | -9.09945954  | 1.99705809  | 0.48590748  |
| C   | -9.99818548  | 1.91426682  | 3.13941751  |
| H   | -8.22085590  | 0.77573900  | 3.53083578  |
| C   | -10.30183801 | 2.62472984  | 0.83836891  |
| H   | -8.75635335  | 2.02866926  | -0.52709701 |
| C   | -10.75120366 | 2.58334027  | 2.16512586  |
| H   | -10.34128543 | 1.88266007  | 4.15242533  |
| H   | -10.87678081 | 3.13556970  | 0.09447027  |
| Br  | -12.38995558 | 3.43881088  | 2.64550839  |

Figure 33 Cartesian coordinates for compound 4c.

50 [8] V. Stepanić, K. G. Trošelj, B. Lučić, Z. Marković and D. Amić, *Food chemistry*, 2013, **141**, 1562–1570.

51 [9] K. A. Wojtunik-Kulesza, *Molecules*, 2020, **25**, 5267.

Compound 5a

| 0 1 |             |             |             |
|-----|-------------|-------------|-------------|
| C   | 0.61663541  | 0.78115797  | -0.48195223 |
| C   | 1.96396239  | 0.50298615  | -0.21502826 |
| C   | 2.88232022  | 1.55260947  | -0.07788593 |
| C   | 2.45337074  | 2.88041214  | -0.20766780 |
| C   | 1.10605437  | 3.15859680  | -0.47466851 |
| C   | 0.18768648  | 2.10896148  | -0.61181456 |
| H   | 3.91103078  | 1.34021128  | 0.12592723  |
| H   | 0.77854293  | 4.17240468  | -0.57381147 |
| C   | 3.46259584  | 4.03380766  | -0.05686355 |
| C   | 3.01482177  | 5.22451373  | -0.92479948 |
| H   | 2.04734717  | 5.55335691  | -0.60738095 |
| H   | 3.71604962  | 6.02588850  | -0.82001518 |
| H   | 2.96995480  | 4.92160717  | -1.95004721 |
| C   | 3.52716994  | 4.46977182  | 1.41872845  |
| H   | 3.83828605  | 3.64246306  | 2.02177736  |
| H   | 4.22839634  | 5.27114723  | 1.52351081  |
| H   | 2.55969463  | 4.79861405  | 1.73614606  |
| C   | 4.85503701  | 3.56051687  | -0.51370285 |
| H   | 5.16614872  | 2.73320875  | 0.08935011  |
| H   | 4.81017160  | 3.25760346  | -1.53894889 |
| H   | 5.55626545  | 4.36188954  | -0.40892138 |
| C   | 2.43538421  | -0.95612523 | -0.07240805 |
| C   | 1.28301417  | -1.81637810 | 0.47858637  |
| H   | 0.45271075  | -1.77404630 | -0.19498884 |
| H   | 1.61056724  | -2.83017666 | 0.57768374  |
| H   | 0.98509237  | -1.44261970 | 1.43589836  |
| C   | 2.86416644  | -1.49406351 | -1.45022072 |
| H   | 3.66483966  | -0.89635550 | -1.83306254 |
| H   | 3.19171961  | -2.50786179 | -1.35111749 |
| H   | 2.03386009  | -1.45173625 | -2.12379318 |
| C   | 3.63040493  | -1.01704030 | 0.89702825  |
| H   | 3.33248858  | -0.64327436 | 1.85433849  |
| H   | 3.95796230  | -2.03083626 | 0.99613148  |
| H   | 4.43107505  | -0.41932951 | 0.51418033  |
| O   | -0.32048454 | -0.28989016 | -0.62182607 |
| H   | -0.36080856 | -0.56173140 | -1.54164925 |
| C   | -1.29288185 | 2.41462194  | -0.90523545 |
| H   | -1.99408616 | 1.61319870  | -1.00978559 |
| N   | -1.68882812 | 3.64026225  | -1.02532757 |
| N   | -3.03482535 | 3.91810155  | -1.29196602 |
| H   | -3.53163356 | 4.01821911  | -0.42990047 |
| C   | -3.13423875 | 5.16594887  | -2.06260769 |
| O   | -2.20363318 | 5.50074770  | -2.84071571 |
| C   | -4.37722177 | 6.06350213  | -1.91772860 |
| C   | -5.41355584 | 5.69071416  | -1.05114618 |
| C   | -4.47199446 | 7.25307397  | -2.65247649 |
| C   | -6.54463434 | 6.50753482  | -0.91926708 |
| H   | -5.34121468 | 4.78242742  | -0.49018045 |
| C   | -5.60307475 | 8.06988752  | -2.52060449 |
| H   | -3.68074778 | 7.53768343  | -3.31416082 |
| C   | -6.63938481 | 7.69713081  | -1.65398361 |
| H   | -7.33589180 | 6.22291583  | -0.25759825 |
| H   | -5.67543169 | 8.97815580  | -3.08159720 |
| C   | -7.88230722 | 8.59475776  | -1.50903899 |
| H   | -8.61920949 | 8.30233459  | -2.22762056 |
| H   | -8.28454459 | 8.49048303  | -0.52302060 |
| H   | -7.60675474 | 9.61513756  | -1.67576343 |

Figure 34 Electronic energies for compound 5a.

Compound 6a

| O 1 |             |             |             |
|-----|-------------|-------------|-------------|
| C   | 0.40765527  | -0.15898619 | 0.65029920  |
| C   | 1.77800431  | 0.07116658  | 0.45871297  |
| C   | 2.22351771  | 1.32636995  | 0.02149266  |
| C   | 1.30070129  | 2.35196141  | -0.21924928 |
| C   | -0.06801942 | 2.12118300  | -0.03332624 |
| C   | -0.51610580 | 0.86598356  | 0.39797009  |
| H   | 3.26872227  | 1.50208928  | -0.12761006 |
| H   | -0.77235703 | 2.90394240  | -0.22079711 |
| C   | 1.79049355  | 3.73398414  | -0.68753094 |
| C   | 2.79599909  | -1.05350659 | 0.72766828  |
| C   | 2.26520552  | -1.97085051 | 1.84477605  |
| H   | 2.97292374  | -2.75147294 | 2.03182033  |
| H   | 2.12100554  | -1.39902330 | 2.73762529  |
| H   | 1.33330169  | -2.39948537 | 1.54106393  |
| C   | 4.13867817  | -0.43686511 | 1.16390047  |
| H   | 4.84614742  | -1.21786006 | 1.35008392  |
| H   | 4.50750748  | 0.20046285  | 0.38737835  |
| H   | 3.99562389  | 0.13494612  | 2.05672936  |
| C   | 0.70217621  | 4.39825460  | -1.55073034 |
| H   | -0.19072508 | 4.51320931  | -0.97238045 |
| H   | 1.04226734  | 5.35905210  | -1.87638410 |
| H   | 0.49857307  | 3.78426808  | -2.40292049 |
| C   | 2.08291285  | 4.61683776  | 0.53976665  |
| H   | 2.83914919  | 4.15462753  | 1.13915829  |
| H   | 2.42283198  | 5.57811037  | 0.21531936  |
| H   | 1.18971823  | 4.73098530  | 1.11790926  |
| C   | 3.07551524  | 3.56873517  | -1.51991644 |
| H   | 3.83186303  | 3.10696261  | -0.92058516 |
| H   | 2.87173995  | 2.95500245  | -2.37248566 |
| H   | 3.41543288  | 4.52965989  | -1.84539962 |
| C   | 3.00338149  | -1.87686907 | -0.55692753 |
| H   | 3.71190541  | -2.65651978 | -0.37011936 |
| H   | 2.07129687  | -2.30648313 | -0.85914207 |
| H   | 3.37103605  | -1.23973784 | -1.33416797 |
| C   | -2.02465984 | 0.61873673  | 0.59067227  |
| C   | -4.13390480 | 0.96969465  | 0.98481671  |
| N   | -3.88804774 | -0.26973339 | 1.26307000  |
| N   | -2.53189283 | -0.49617794 | 1.00650710  |
| O   | -3.02936847 | 1.60503184  | 0.33259208  |
| O   | -0.04736569 | -1.43798013 | 1.10042907  |
| H   | -0.85490596 | -1.33008382 | 1.60904159  |
| C   | -5.45690195 | 1.68656362  | 1.31705998  |
| C   | -5.62473647 | 3.03478156  | 0.97262904  |
| C   | -6.49152925 | 0.99429381  | 1.96052686  |
| C   | -6.82719816 | 3.69029754  | 1.26779791  |
| H   | -4.83357290 | 3.56359488  | 0.48340760  |
| C   | -7.69530848 | 1.64973777  | 2.25503275  |
| H   | -6.36267883 | -0.03445476 | 2.22652970  |
| C   | -7.86285798 | 2.99784437  | 1.90898371  |
| H   | -6.95421404 | 4.71950744  | 1.00364305  |
| H   | -8.48680652 | 1.12063134  | 2.74429003  |
| C   | -9.18506506 | 3.71775089  | 2.23317968  |
| H   | -9.08399616 | 4.25111021  | 3.15524959  |
| H   | -9.41888271 | 4.40519823  | 1.44727545  |
| H   | -9.97099231 | 2.99713878  | 2.32226696  |

Figure 35 Electronic energies for compound 6a.



Compound 6d

| 0 1 |             |             |             |
|-----|-------------|-------------|-------------|
| C   | 0.39531216  | -0.14482330 | 0.62256382  |
| C   | 1.76835553  | 0.08054436  | 0.45571276  |
| C   | 2.22556661  | 1.33330968  | 0.02508469  |
| C   | 1.30971052  | 2.36067632  | -0.23873525 |
| C   | -0.06334033 | 2.13529364  | -0.07184004 |
| C   | -0.52050980 | 0.88256302  | 0.35885077  |
| H   | 3.27393423  | 1.50541063  | -0.10225127 |
| H   | -0.76262908 | 2.91971662  | -0.27324163 |
| C   | 1.81206410  | 3.73732572  | -0.71204202 |
| C   | 2.77470739  | -1.04850305 | 0.74554168  |
| C   | 2.20997503  | -1.97053844 | 1.84213504  |
| H   | 2.90920279  | -2.75505384 | 2.04347124  |
| H   | 2.04356563  | -1.40347346 | 2.73412709  |
| H   | 1.28478990  | -2.39373094 | 1.51073432  |
| C   | 4.10625915  | -0.43938241 | 1.22258179  |
| H   | 4.80550161  | -1.22387341 | 1.42394168  |
| H   | 4.49862440  | 0.20126983  | 0.46068051  |
| H   | 3.93981352  | 0.12768022  | 2.11457375  |
| C   | 0.74591074  | 4.39172098  | -1.61017995 |
| H   | -0.16106867 | 4.51418561  | -1.05582848 |
| H   | 1.09486159  | 5.34827130  | -1.93902500 |
| H   | 0.56314993  | 3.76737338  | -2.45970694 |
| C   | 2.07513692  | 4.63594521  | 0.51059519  |
| H   | 2.81590459  | 4.18126942  | 1.13463755  |
| H   | 2.42412111  | 5.59247801  | 0.18170873  |
| H   | 1.16816432  | 4.75845748  | 1.06493221  |
| C   | 3.11746765  | 3.56094749  | -1.50984780 |
| H   | 3.85819835  | 3.10620270  | -0.88578887 |
| H   | 2.93469546  | 2.93659835  | -2.35937791 |
| H   | 3.46650996  | 4.51747274  | -1.83869351 |
| C   | 3.01420310  | -1.86462499 | -0.53823425 |
| H   | 3.71340270  | -2.64915216 | -0.33691154 |
| H   | 2.08899749  | -2.28780759 | -0.86964701 |
| H   | 3.40657808  | -1.22396928 | -1.30012929 |
| C   | -2.02926035 | 0.63493844  | 0.54236642  |
| C   | -4.13472135 | 0.97559919  | 0.95216667  |
| N   | -3.88788650 | -0.26855449 | 1.20255235  |
| N   | -2.53310567 | -0.48777519 | 0.93868789  |
| O   | -3.03662619 | 1.62329291  | 0.30028755  |
| O   | -0.07125676 | -1.42317568 | 1.06189465  |
| H   | -0.88502355 | -1.31320404 | 1.55919893  |
| C   | -5.45375744 | 1.68077667  | 1.31879732  |
| C   | -5.63311078 | 3.03596764  | 1.01019463  |
| C   | -6.47469980 | 0.96729896  | 1.96107843  |
| C   | -6.83338568 | 3.67770707  | 1.34397451  |
| C   | -7.67497568 | 1.60905613  | 2.29489011  |
| H   | -6.33779727 | -0.06744698 | 2.19661559  |
| C   | -7.85430566 | 2.96427017  | 1.98635525  |
| H   | -6.97030166 | 4.71240873  | 1.10837103  |
| H   | -8.45447721 | 1.06433673  | 2.78534701  |
| H   | -8.77072232 | 3.45425941  | 2.24124908  |
| Cl  | -4.35095000 | 3.93192622  | 0.20337649  |

Figure 36 Electronic energies for compound 6d.

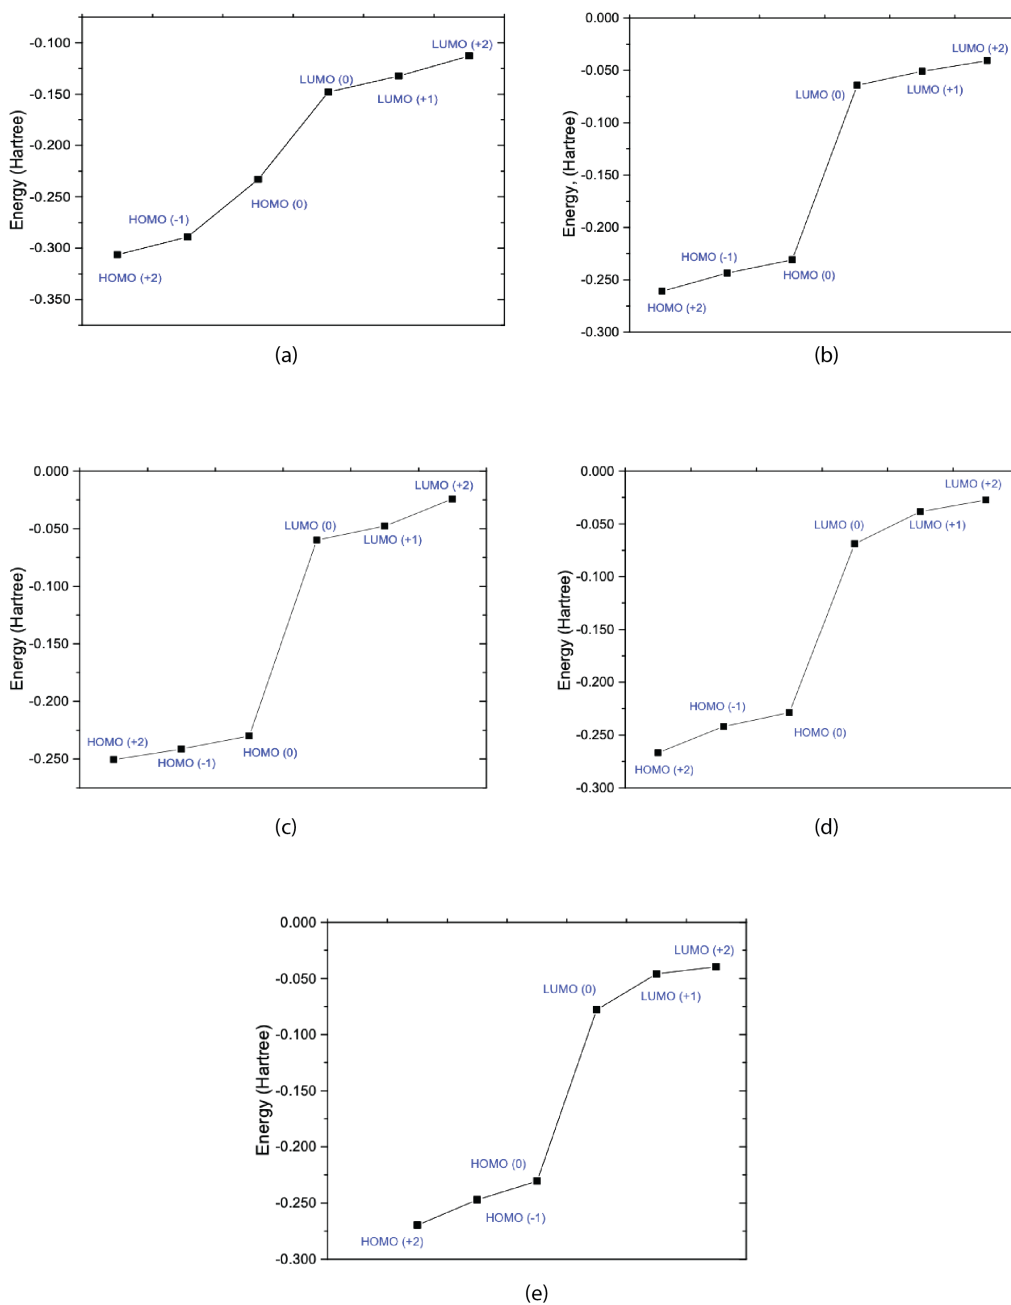

**Figure 37** Electronic energies for compounds (a) 3; (b) 4c; (c) 5a; (d) 6a and (e) 6d in the gas phase at B3lyp/6-311++g(d,p).

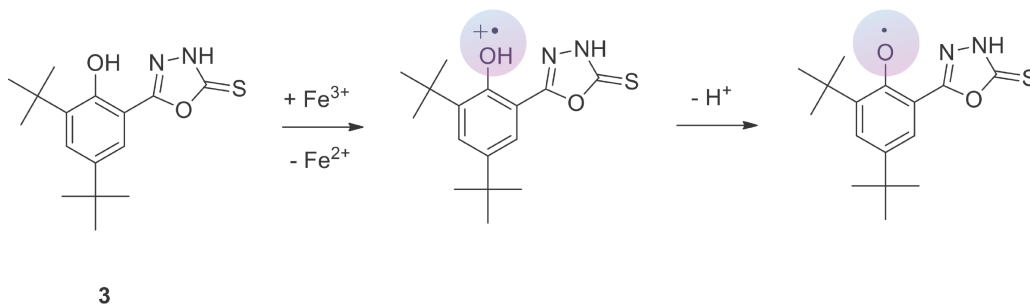

**Figure 38** Single Electron Transfer (SET) Mechanism of Compound 3.
